# Supplementary material
Source: publisher figshare collection journal article supplement (https://rs.figshare.com/ndownloader/files/13123175)
Supplement: Supplementary file 1 [file 13123175]

## Sheet: Eutheria_occurrences_BDR
genus	status	ma_min	ma_max
Aaptoryctes	extinct	57.7	58.89
Aaptoryctes	extinct	58.9	59.99
Aaptoryctes	extinct	58.9	59.99
Aaptoryctes	extinct	58.9	59.99
Aatotomus	extinct	58.9	59.99
Acidomomys	extinct	56.5	56.95
Acmeodon	extinct	58.9	59.99
Acmeodon	extinct	61.7	62.1
Acmeodon	extinct	61.7	62.1
Acmeodon	extinct	61.7	62.1
Acmeodon	extinct	61.7	62.1
Acmeodon	extinct	61.7	62.1
Acmeodon	extinct	62.11	62.49
Acmeodon	extinct	62.11	62.49
Acmeodon	extinct	62.11	62.49
Acmeodon	extinct	62.11	62.49
Acmeodon	extinct	62.5	63.39
Acmeodon	extinct	62.5	63.39
Acmeodon	extinct	62.5	63.39
Acmeodon	extinct	63.11	65.12
Acritoparamys	extinct	55.85	56.49
Acritoparamys	extinct	56.5	56.95
Acritoparamys	extinct	56.5	56.95
Acritoparamys	extinct	56.5	56.95
Acritoparamys	extinct	56.5	56.95
Acritoparamys	extinct	56.96	57.39
Adapisorella	extinct	57.7	58.89
Adapisorella	extinct	60	60.79
Adapisorex	extinct	57.7	58.89
Adeloxenus	extinct	60	60.79
Adunator	extinct	56.5	56.95
Adunator	extinct	56.5	56.95
Adunator	extinct	56.5	56.95
Adunator	extinct	57.7	58.89
Adunator	extinct	57.7	58.89
Adunator	extinct	57.7	58.89
Adunator	extinct	57.7	58.89
Adunator	extinct	57.7	58.89
Adunator	extinct	57.7	58.89
Adunator	extinct	57.7	58.89
Adunator	extinct	58.9	59.99
Adunator	extinct	58.9	59.99
Adunator	extinct	58.9	59.99
Adunator	extinct	58.9	59.99
Adunator	extinct	58.9	59.99
Adunator	extinct	60	60.79
Adunator	extinct	60	60.79
Adunator	extinct	60	60.79
Adunator	extinct	60	60.79
Adunator	extinct	60	60.79
Adunator	extinct	61.7	62.1
Alagomys	extinct	56.96	57.39
Aletodon	extinct	56.5	56.95
Aletodon	extinct	56.5	56.95
Aletodon	extinct	56.5	56.95
Aletodon	extinct	56.96	57.39
Aletodon	extinct	57.7	58.89
Aletodon	extinct	60	60.79
Aletodon	extinct	60	60.79
Aletodon	extinct	60	60.79
Aletodon	extinct	60	60.79
Aletodon	extinct	55.85	56.49
Aletodon	extinct	55.85	56.49
Alostera	extinct	66.04	69.9
Alostera	extinct	66.04	69.9
Alostera	extinct	66.04	69.9
Alostera	extinct	66.04	69.9
Altacreodus	extinct	66.04	69.9
Altacreodus	extinct	66.04	69.9
Altacreodus	extinct	66.04	69.9
Altacreodus	extinct	66.04	69.9
Altacreodus	extinct	66.04	69.9
Altacreodus	extinct	66.04	69.9
Altacreodus	extinct	66.04	69.9
Alticonus	extinct	65.6	65.96
Alticonus	extinct	65.97	66.03
Alveugena	extinct	65.6	65.96
Alveugena	extinct	65.97	66.03
Ambilestes	extinct	66.04	69.9
Ambilestes	extinct	66.04	69.9
Ambilestes	extinct	66.04	69.9
Amelotabes	extinct	58.9	59.99
Ampliconus	extinct	65.6	65.96
Ampliconus	extinct	65.97	66.03
Ampliconus	extinct	65.97	66.03
Anacodon	extinct	56.5	56.95
Anacodon	extinct	56.5	56.95
Anacodon	extinct	58.9	59.99
Anasazia	extinct	62.5	63.39
Anisonchus	extinct	61.7	62.1
Anisonchus	extinct	62.11	62.49
Anisonchus	extinct	62.11	62.49
Anisonchus	extinct	62.11	62.49
Anisonchus	extinct	62.11	62.49
Anisonchus	extinct	62.11	62.49
Anisonchus	extinct	62.11	62.49
Anisonchus	extinct	62.5	63.39
Anisonchus	extinct	62.5	63.39
Anisonchus	extinct	62.5	63.39
Anisonchus	extinct	62.5	63.39
Anisonchus	extinct	62.5	63.39
Anisonchus	extinct	62.5	63.39
Anisonchus	extinct	62.5	63.39
Anisonchus	extinct	62.5	63.39
Anisonchus	extinct	62.5	63.39
Anisonchus	extinct	62.5	63.39
Anisonchus	extinct	62.5	63.39
Anisonchus	extinct	62.5	63.39
Anisonchus	extinct	63.11	65.12
Anisonchus	extinct	63.11	65.12
Anisonchus	extinct	63.11	65.12
Anisonchus	extinct	63.11	65.12
Anisonchus	extinct	65.11	65.59
Anisonchus	extinct	65.11	65.59
Anisonchus	extinct	65.11	65.59
Anisonchus	extinct	65.6	65.96
Anisonchus	extinct	65.6	65.96
Anisonchus	extinct	65.6	65.96
Anisonchus	extinct	65.6	65.96
Ankalagon	extinct	62.11	62.49
Ankalagon	extinct	62.5	63.39
Apatemys	extinct	58.9	59.99
Aphanocyon	extinct	60	60.79
Apheliscus	extinct	55.85	56.49
Apheliscus	extinct	55.85	56.49
Apheliscus	extinct	56.5	56.95
Apheliscus	extinct	56.5	56.95
Apheliscus	extinct	56.5	56.95
Apheliscus	extinct	56.5	56.95
Apheliscus	extinct	56.5	56.95
Apheliscus	extinct	56.96	57.39
Apheliscus	extinct	56.96	57.39
Apheliscus	extinct	57.4	57.69
Aphronorus	extinct	56.96	57.39
Aphronorus	extinct	58.9	59.99
Aphronorus	extinct	61.7	62.1
Aphronorus	extinct	61.7	62.1
Aphronorus	extinct	61.7	62.1
Aphronorus	extinct	61.7	62.1
Aphronorus	extinct	61.7	62.1
Aphronorus	extinct	61.7	62.1
Aphronorus	extinct	61.7	62.1
Aphronorus	extinct	62.11	62.49
Aphronorus	extinct	62.11	62.49
Aphronorus	extinct	62.11	62.49
Aphronorus	extinct	62.11	62.49
Aphronorus	extinct	62.5	63.39
Aphronorus	extinct	62.5	63.39
Aphronorus	extinct	62.5	63.39
Aphronorus	extinct	62.5	63.39
Aphronorus	extinct	63.11	65.12
Apternodus	extinct	57.7	58.89
Arctocyon	extinct	57.4	57.69
Arctocyon	extinct	57.7	58.89
Arctocyon	extinct	57.7	58.89
Arctocyon	extinct	57.7	58.89
Arctocyon	extinct	57.7	58.89
Arctocyon	extinct	58.9	59.99
Arctocyon	extinct	58.9	59.99
Arctocyon	extinct	58.9	59.99
Arctocyon	extinct	58.9	59.99
Arctocyon	extinct	58.9	59.99
Arctocyon	extinct	58.9	59.99
Arctocyon	extinct	58.9	59.99
Arctocyon	extinct	58.9	59.99
Arctocyon	extinct	60	60.79
Arctocyon	extinct	60	60.79
Arctocyon	extinct	60	60.79
Arctocyon	extinct	60	60.79
Arctocyon	extinct	60.08	61.9
Arctocyon	extinct	60.08	61.9
Arctocyon	extinct	61.7	62.1
Arctocyon	extinct	61.7	62.1
Arctocyon	extinct	61.7	62.1
Arctocyon	extinct	61.7	62.1
Arctocyon	extinct	62.11	62.49
Arctocyon	extinct	62.11	62.49
Arctocyon	extinct	62.11	62.49
Arctocyon	extinct	62.5	63.39
Arctocyon	extinct	62.5	63.39
Arctocyon	extinct	62.5	63.39
Arctocyon	extinct	62.5	63.39
Arctocyon	extinct	62.5	63.39
Arctocyon	extinct	62.5	63.39
Arctocyon	extinct	62.5	63.39
Arctodontomys	extinct	56.96	57.39
Arctodontomys	extinct	57.7	58.89
Arctostylops	extinct	55.85	56.49
Arctostylops	extinct	55.85	56.49
Arctostylops	extinct	56.5	56.95
Arctostylops	extinct	56.5	56.95
Arctostylops	extinct	56.5	56.95
Auraria	extinct	65.97	66.03
Avunculus	extinct	62.11	62.49
Azygonyx	extinct	56.5	56.95
Azygonyx	extinct	56.96	57.39
Baioconodon	extinct	63.11	65.12
Baioconodon	extinct	65.11	65.59
Baioconodon	extinct	65.11	65.59
Baioconodon	extinct	65.11	65.59
Baioconodon	extinct	65.6	65.96
Baioconodon	extinct	65.6	65.96
Baioconodon	extinct	65.6	65.96
Baioconodon	extinct	65.97	66.03
Baioconodon	extinct	65.97	66.03
Baioconodon	extinct	65.97	66.03
Baioconodon	extinct	65.97	66.03
Baioconodon	extinct	65.97	66.03
Baioconodon	extinct	65.97	66.03
Baioconodon	extinct	66.04	69.9
Baioconodon	extinct	66.04	69.9
Barylambda	extinct	56.5	56.95
Barylambda	extinct	56.5	56.95
Barylambda	extinct	60	60.79
Batodon	extinct	65.97	66.03
Batodon	extinct	66.04	69.9
Batodon	extinct	66.04	69.9
Batodon	extinct	66.04	69.9
Batodon	extinct	66.04	69.9
Batodon	extinct	66.04	69.9
Batodon	extinct	66.04	69.9
Bessoecetor	extinct	57.7	58.89
Bessoecetor	extinct	58.9	59.99
Bessoecetor	extinct	58.9	59.99
Bessoecetor	extinct	58.9	59.99
Bessoecetor	extinct	58.9	59.99
Bessoecetor	extinct	58.9	59.99
Bessoecetor	extinct	58.9	59.99
Bessoecetor	extinct	58.9	59.99
Bessoecetor	extinct	58.9	59.99
Bessoecetor	extinct	58.9	59.99
Bessoecetor	extinct	58.9	59.99
Bessoecetor	extinct	60	60.79
Bessoecetor	extinct	60	60.79
Bessoecetor	extinct	60	60.79
Bessoecetor	extinct	60	60.79
Bessoecetor	extinct	60	60.79
Bessoecetor	extinct	60	60.79
Bessoecetor	extinct	60	60.79
Bessoecetor	extinct	60	60.79
Bessoecetor	extinct	60	60.79
Bessoecetor	extinct	60.08	61.9
Bessoecetor	extinct	61.7	62.1
Bessoecetor	extinct	61.7	62.1
Bessoecetor	extinct	61.7	62.1
Bessoecetor	extinct	62.11	62.49
Bessoecetor	extinct	62.5	63.39
Bessoecetor	extinct	62.5	63.39
Bessoecetor	extinct	62.5	63.39
Bessoecetor	extinct	62.5	63.39
Bessoecetor	extinct	63.11	65.12
Bessoecetor	extinct	65.11	65.59
Betonnia	extinct	65.11	65.59
Betonnia	extinct	65.6	65.96
Betonnia	extinct	65.6	65.96
Bisonalveus	extinct	58.9	59.99
Bisonalveus	extinct	58.9	59.99
Bisonalveus	extinct	60	60.79
Bisonalveus	extinct	60	60.79
Bisonalveus	extinct	60	60.79
Bisonalveus	extinct	60	60.79
Bisonalveus	extinct	60	60.79
Bisonalveus	extinct	60	60.79
Bisonalveus	extinct	60.08	61.9
Bisonalveus	extinct	61.7	62.1
Bisonalveus	extinct	61.7	62.1
Bomburodon	extinct	63.11	65.12
Bomburodon	extinct	65.11	65.59
Bomburodon	extinct	65.6	65.96
Bomburodon	extinct	65.6	65.96
Boreocyon	extinct	60	60.79
Boreocyon	extinct	61.7	62.1
Boreocyon	extinct	61.7	62.1
Boreocyon	extinct	61.7	62.1
Boreocyon	extinct	62.5	63.39
Bryanictis	extinct	58.9	59.99
Bryanictis	extinct	58.9	59.99
Bryanictis	extinct	61.7	62.1
Bryanictis	extinct	62.11	62.49
Bryanictis	extinct	62.5	63.39
Bryanictis	extinct	62.5	63.39
Bryanictis	extinct	62.5	63.39
Bryanictis	extinct	62.5	63.39
Bryanictis	extinct	62.5	63.39
Bryanictis	extinct	63.11	65.12
Bubogonia	extinct	62.11	62.49
Bubogonia	extinct	65.11	65.59
Bubogonia	extinct	65.11	65.59
Bubogonia	extinct	65.6	65.96
Bubogonia	extinct	65.6	65.96
Caenolambda	extinct	58.9	59.99
Caenolambda	extinct	60	60.79
Caenolambda	extinct	60	60.79
Caenolambda	extinct	60	60.79
Caenolambda	extinct	60.08	61.9
Caenolambda	extinct	61.7	62.1
Carcinodon	extinct	65.11	65.59
Carcinodon	extinct	65.6	65.96
Carcinodon	extinct	65.6	65.96
Carcinodon	extinct	65.6	65.96
Carcinodon	extinct	65.6	65.96
Carcinodon	extinct	65.97	66.03
Carcinodon_x	extinct	65.11	65.59
Carcinodon_x	extinct	65.11	65.59
Carcinodon_x	extinct	65.11	65.59
Carcinodon_x	extinct	65.6	65.96
Carcinodon_x	extinct	65.6	65.96
Carcinodon_x	extinct	65.6	65.96
Carcinodon_x	extinct	65.6	65.96
Carcinodon_x	extinct	65.6	65.96
Carpocristes	extinct	57.7	58.89
Carpocristes	extinct	58.9	59.99
Carpodaptes	extinct	57.7	58.89
Carpodaptes	extinct	57.7	58.89
Carpodaptes	extinct	58.9	59.99
Carpodaptes	extinct	58.9	59.99
Carpodaptes	extinct	58.9	59.99
Carpodaptes	extinct	58.9	59.99
Carpodaptes	extinct	58.9	59.99
Carpodaptes	extinct	58.9	59.99
Carpodaptes	extinct	58.9	59.99
Carpodaptes	extinct	58.9	59.99
Carpodaptes	extinct	60	60.79
Carpodaptes	extinct	60	60.79
Carpodaptes	extinct	60	60.79
Carpodaptes	extinct	60	60.79
Carpodaptes	extinct	60	60.79
Carpodaptes	extinct	60	60.79
Carpodaptes	extinct	60	60.79
Carpodaptes	extinct	60	60.79
Carpodaptes	extinct	60	60.79
Carpodaptes	extinct	60.08	61.9
Carpodaptes	extinct	61.7	62.1
Carpodaptes	extinct	61.7	62.1
Carpolestes	extinct	55.85	56.49
Carpolestes	extinct	56.5	56.95
Carpolestes	extinct	56.5	56.95
Carpolestes	extinct	56.5	56.95
Carpolestes	extinct	56.5	56.95
Carpolestes	extinct	56.5	56.95
Carpolestes	extinct	56.5	56.95
Carpolestes	extinct	56.5	56.95
Carpolestes	extinct	56.5	56.95
Carpolestes	extinct	56.5	56.95
Carpolestes	extinct	56.96	57.39
Carpolestes	extinct	56.96	57.39
Carpolestes	extinct	56.96	57.39
Carpolestes	extinct	57.4	57.69
Carpolestes	extinct	57.7	58.89
Carpolestes	extinct	57.7	58.89
Carpolestes	extinct	57.7	58.89
Carpolestes	extinct	57.7	58.89
Carpolestes	extinct	57.7	58.89
Carpolestes	extinct	57.7	58.89
Carpolestes	extinct	57.7	58.89
Carpolestes	extinct	58.9	59.99
Carpomegodon	extinct	58.9	59.99
Carpomegodon	extinct	58.9	59.99
Cedrocherus	extinct	60	60.79
Cedrocherus	extinct	60	60.79
Cervictis	extinct	60	60.79
Cervictis	extinct	60	60.79
Cervictis	extinct	61.7	62.1
Ceutholestes	extinct	56.96	57.39
Chacomylus	extinct	65.11	65.59
Chacopterygus	extinct	65.6	65.96
Chiromyoides	extinct	56.5	56.95
Chiromyoides	extinct	56.5	56.95
Chiromyoides	extinct	56.5	56.95
Chiromyoides	extinct	56.96	57.39
Chiromyoides	extinct	56.96	57.39
Chiromyoides	extinct	57.7	58.89
Chiromyoides	extinct	57.7	58.89
Chiromyoides	extinct	57.7	58.89
Chiromyoides	extinct	57.7	58.89
Chiromyoides	extinct	57.7	58.89
Chiromyoides	extinct	58.9	59.99
Chiromyoides	extinct	58.9	59.99
Chiromyoides	extinct	58.9	59.99
Chiromyoides	extinct	58.9	59.99
Chiromyoides	extinct	60	60.79
Chiromyoides	extinct	60	60.79
Choeroclaenus	extinct	65.11	65.59
Choeroclaenus	extinct	65.6	65.96
Choeroclaenus	extinct	65.6	65.96
Chriacus	extinct	55.85	56.49
Chriacus	extinct	56.5	56.95
Chriacus	extinct	56.5	56.95
Chriacus	extinct	56.5	56.95
Chriacus	extinct	56.5	56.95
Chriacus	extinct	56.96	57.39
Chriacus	extinct	58.9	59.99
Chriacus	extinct	58.9	59.99
Chriacus	extinct	60	60.79
Chriacus	extinct	60	60.79
Chriacus	extinct	60	60.79
Chriacus	extinct	60	60.79
Chriacus	extinct	60	60.79
Chriacus	extinct	60	60.79
Chriacus	extinct	60.08	61.9
Chriacus	extinct	60.08	61.9
Chriacus	extinct	61.7	62.1
Chriacus	extinct	61.7	62.1
Chriacus	extinct	61.7	62.1
Chriacus	extinct	61.7	62.1
Chriacus	extinct	61.7	62.1
Chriacus	extinct	62.11	62.49
Chriacus	extinct	62.11	62.49
Chriacus	extinct	62.11	62.49
Chriacus	extinct	62.11	62.49
Chriacus	extinct	62.11	62.49
Chriacus	extinct	62.5	63.39
Chriacus	extinct	62.5	63.39
Chriacus	extinct	62.5	63.39
Chriacus	extinct	62.5	63.39
Chriacus	extinct	62.5	63.39
Chriacus	extinct	62.5	63.39
Chriacus	extinct	62.5	63.39
Chriacus	extinct	62.5	63.39
Chriacus	extinct	62.5	63.39
Chriacus	extinct	62.5	63.39
Chriacus	extinct	62.5	63.39
Chriacus	extinct	62.5	63.39
Chriacus	extinct	63.11	65.12
Chriacus	extinct	63.11	65.12
Chriacus	extinct	63.11	65.12
Chriacus	extinct	63.11	65.12
Cimolestes	extinct	65.11	65.59
Cimolestes	extinct	65.11	65.59
Cimolestes	extinct	65.6	65.96
Cimolestes	extinct	65.97	66.03
Cimolestes	extinct	65.97	66.03
Cimolestes	extinct	66.04	69.9
Cimolestes	extinct	66.04	69.9
Cimolestes	extinct	66.04	69.9
Cimolestes	extinct	66.04	69.9
Cimolestes	extinct	66.04	69.9
Cimolestes	extinct	66.04	69.9
Cimolestes	extinct	66.04	69.9
Cimolestes	extinct	66.04	69.9
Claenodon	extinct	57.7	58.89
Claenodon	extinct	60	60.79
Claenodon	extinct	60	60.79
Claenodon	extinct	60	60.79
Claenodon	extinct	60.08	61.9
Claenodon	extinct	61.7	62.1
Claenodon	extinct	62.11	62.49
Claenodon	extinct	62.11	62.49
Claenodon	extinct	62.11	62.49
Claenodon	extinct	62.5	63.39
Claenodon	extinct	62.5	63.39
Claenodon	extinct	63.11	65.12
Colpoclaenus	extinct	58.9	59.99
Colpoclaenus	extinct	60	60.79
Colpoclaenus	extinct	60.08	61.9
Colpoclaenus	extinct	61.7	62.1
Colpoclaenus	extinct	62.11	62.49
Colpoclaenus	extinct	62.11	62.49
Colpoclaenus	extinct	62.11	62.49
Conacodon	extinct	65.11	65.59
Conacodon	extinct	65.11	65.59
Conacodon	extinct	65.11	65.59
Conacodon	extinct	65.6	65.96
Conacodon	extinct	65.6	65.96
Conacodon	extinct	65.6	65.96
Conacodon	extinct	65.6	65.96
Conacodon	extinct	65.6	65.96
Conacodon	extinct	65.6	65.96
Conacodon	extinct	65.97	66.03
Conacodon	extinct	65.97	66.03
Conoryctella	extinct	62.5	63.39
Conoryctella	extinct	62.5	63.39
Conoryctella	extinct	62.5	63.39
Conoryctella	extinct	63.11	65.12
Conoryctes	extinct	62.11	62.49
Conoryctes	extinct	62.11	62.49
Conoryctes	extinct	62.11	62.49
Conoryctes	extinct	62.5	63.39
Conoryctes	extinct	62.5	63.39
Conoryctes	extinct	62.5	63.39
Copecion	extinct	60	60.79
Coriphagus	extinct	61.7	62.1
Coriphagus	extinct	62.11	62.49
Coriphagus	extinct	62.11	62.49
Coriphagus	extinct	62.5	63.39
Coriphagus	extinct	62.5	63.39
Coriphagus	extinct	62.5	63.39
Coriphagus	extinct	62.5	63.39
Coriphagus	extinct	62.5	63.39
Coriphagus	extinct	62.5	63.39
Coriphagus	extinct	62.5	63.39
Coryphodon	extinct	55.85	56.49
Coryphodon	extinct	55.85	56.49
Coryphodon	extinct	56.5	56.95
Coryphodon	extinct	56.5	56.95
Coryphodon	extinct	56.5	56.95
Coryphodon	extinct	56.5	56.95
Coryphodon	extinct	56.5	56.95
Coryphodon	extinct	56.5	56.95
Coryphodon	extinct	56.96	57.39
Cyriacotherium	extinct	55.85	56.49
Cyriacotherium	extinct	56.5	56.95
Cyriacotherium	extinct	56.96	57.39
Cyriacotherium	extinct	57.7	58.89
Cyriacotherium	extinct	58.9	59.99
Cyriacotherium	extinct	58.9	59.99
Cyriacotherium	extinct	58.9	59.99
Cyriacotherium	extinct	58.9	59.99
Cyriacotherium	extinct	58.9	59.99
Cyriacotherium	extinct	60	60.79
Deltatherium	extinct	62.5	63.39
Deltatherium	extinct	62.5	63.39
Deltatherium	extinct	62.5	63.39
Deltatherium	extinct	62.5	63.39
Deltatherium	extinct	62.5	63.39
Deltatherium	extinct	62.5	63.39
Deltatherium	extinct	62.5	63.39
Deltatherium	extinct	62.5	63.39
Desmatoclaenus	extinct	60.08	61.9
Desmatoclaenus	extinct	63.11	65.12
Desmatoclaenus	extinct	65.11	65.59
Desmatoclaenus	extinct	65.11	65.59
Desmatoclaenus	extinct	65.6	65.96
Desmatoclaenus	extinct	65.6	65.96
Desmatoclaenus	extinct	65.6	65.96
Desmatoclaenus	extinct	65.6	65.96
Deuterogonodon	extinct	62.5	63.39
Deuterogonodon	extinct	62.5	63.39
Deuterogonodon	extinct	62.5	63.39
Deuterogonodon	extinct	62.5	63.39
Deuterogonodon	extinct	63.11	65.12
Diacocherus	extinct	55.85	56.49
Diacocherus	extinct	56.96	57.39
Diacocherus	extinct	56.96	57.39
Didymictis	extinct	55.85	56.49
Didymictis	extinct	55.85	56.49
Didymictis	extinct	56.5	56.95
Didymictis	extinct	56.5	56.95
Didymictis	extinct	56.5	56.95
Didymictis	extinct	56.5	56.95
Didymictis	extinct	56.5	56.95
Didymictis	extinct	56.5	56.95
Didymictis	extinct	56.5	56.95
Didymictis	extinct	56.5	56.95
Didymictis	extinct	56.96	57.39
Didymictis	extinct	56.96	57.39
Didymictis	extinct	57.4	57.69
Didymictis	extinct	57.7	58.89
Didymictis	extinct	57.7	58.89
Didymictis	extinct	58.9	59.99
Didymictis	extinct	58.9	59.99
Didymictis	extinct	58.9	59.99
Didymictis	extinct	58.9	59.99
Didymictis	extinct	60	60.79
Didymictis	extinct	60	60.79
Dipsalidictis	extinct	55.85	56.49
Dipsalidictis	extinct	55.85	56.49
Dipsalidictis	extinct	56.5	56.95
Dipsalidictis	extinct	56.5	56.95
Dipsalidictis	extinct	56.5	56.95
Dipsalidictis	extinct	56.5	56.95
Dipsalidictis	extinct	56.96	57.39
Dipsalidictis	extinct	57.4	57.69
Dipsalodon	extinct	55.85	56.49
Dipsalodon	extinct	56.5	56.95
Dipsalodon	extinct	56.5	56.95
Dipsalodon	extinct	57.4	57.69
Dipsalodon	extinct	58.9	59.99
Dissacus	extinct	55.85	56.49
Dissacus	extinct	56.5	56.95
Dissacus	extinct	56.5	56.95
Dissacus	extinct	56.5	56.95
Dissacus	extinct	56.5	56.95
Dissacus	extinct	56.5	56.95
Dissacus	extinct	56.5	56.95
Dissacus	extinct	56.96	57.39
Dissacus	extinct	56.96	57.39
Dissacus	extinct	57.4	57.69
Dissacus	extinct	57.7	58.89
Dissacus	extinct	57.7	58.89
Dissacus	extinct	58.9	59.99
Dissacus	extinct	60	60.79
Dissacus	extinct	60	60.79
Dissacus	extinct	60	60.79
Dissacus	extinct	60	60.79
Dissacus	extinct	60	60.79
Dissacus	extinct	60.08	61.9
Dissacus	extinct	61.7	62.1
Dissacus	extinct	61.7	62.1
Dissacus	extinct	61.7	62.1
Dissacus	extinct	62.11	62.49
Dissacus	extinct	62.11	62.49
Dissacus	extinct	62.11	62.49
Dissacus	extinct	62.5	63.39
Dissacus	extinct	62.5	63.39
Dissacus	extinct	62.5	63.39
Dissacus	extinct	62.5	63.39
Dissacus	extinct	65.6	65.96
Dorraletes	extinct	57.7	58.89
Dorraletes	extinct	58.9	59.99
Dorraletes	extinct	58.9	59.99
Dorraletes	extinct	60	60.79
Dorraletes	extinct	60	60.79
Draconodus	extinct	63.11	65.12
Dryomomys	extinct	55.85	56.49
Dryomomys	extinct	56.96	57.39
Ectocion	extinct	55.85	56.49
Ectocion	extinct	56.5	56.95
Ectocion	extinct	56.5	56.95
Ectocion	extinct	56.5	56.95
Ectocion	extinct	56.5	56.95
Ectocion	extinct	56.5	56.95
Ectocion	extinct	56.5	56.95
Ectocion	extinct	56.5	56.95
Ectocion	extinct	56.5	56.95
Ectocion	extinct	56.5	56.95
Ectocion	extinct	56.5	56.95
Ectocion	extinct	56.96	57.39
Ectocion	extinct	56.96	57.39
Ectocion	extinct	57.4	57.69
Ectocion	extinct	57.7	58.89
Ectocion	extinct	57.7	58.89
Ectocion	extinct	57.7	58.89
Ectocion	extinct	57.7	58.89
Ectocion	extinct	57.7	58.89
Ectocion	extinct	57.7	58.89
Ectocion	extinct	57.7	58.89
Ectocion	extinct	58.9	59.99
Ectocion	extinct	58.9	59.99
Ectocion	extinct	58.9	59.99
Ectocion	extinct	58.9	59.99
Ectocion	extinct	58.9	59.99
Ectocion	extinct	58.9	59.99
Ectocion	extinct	58.9	59.99
Ectocion	extinct	58.9	59.99
Ectocion	extinct	58.9	59.99
Ectocion	extinct	58.9	59.99
Ectocion	extinct	58.9	59.99
Ectocion	extinct	58.9	59.99
Ectocion	extinct	58.9	59.99
Ectocion	extinct	60	60.79
Ectocion	extinct	60	60.79
Ectocion	extinct	60	60.79
Ectocion	extinct	60	60.79
Ectocion	extinct	60	60.79
Ectocion	extinct	60	60.79
Ectocion	extinct	60	60.79
Ectocion	extinct	60	60.79
Ectocion	extinct	60	60.79
Ectocion	extinct	60	60.79
Ectocion	extinct	60	60.79
Ectocion	extinct	60	60.79
Ectocion	extinct	60.08	61.9
Ectocion	extinct	60.08	61.9
Ectocion	extinct	61.7	62.1
Ectocion	extinct	61.7	62.1
Ectocion	extinct	61.7	62.1
Ectocion	extinct	61.7	62.1
Ectocion	extinct	61.7	62.1
Ectocion	extinct	61.7	62.1
Ectocion	extinct	61.7	62.1
Ectocion	extinct	61.7	62.1
Ectocion	extinct	62.11	62.49
Ectoconus	extinct	65.11	65.59
Ectoconus	extinct	65.11	65.59
Ectoconus	extinct	65.11	65.59
Ectoconus	extinct	65.6	65.96
Ectoconus	extinct	65.6	65.96
Ectoconus	extinct	65.6	65.96
Ectoconus	extinct	65.6	65.96
Ectoconus	extinct	65.6	65.96
Ectoconus	extinct	65.6	65.96
Ectoganus	extinct	55.85	56.49
Ectoganus	extinct	56.5	56.95
Ectoganus	extinct	56.5	56.95
Ectoganus	extinct	56.96	57.39
Ectoganus	extinct	56.96	57.39
Ectoganus	extinct	57.4	57.69
Ectoganus	extinct	57.7	58.89
Ectoganus	extinct	58.9	59.99
Edworthia	extinct	62.5	63.39
Ellipsodon	extinct	61.7	62.1
Ellipsodon	extinct	62.5	63.39
Ellipsodon	extinct	62.5	63.39
Ellipsodon	extinct	62.5	63.39
Ellipsodon	extinct	62.5	63.39
Ellipsodon	extinct	62.5	63.39
Ellipsodon	extinct	62.5	63.39
Ellipsodon	extinct	62.5	63.39
Ellipsodon	extinct	63.11	65.12
Ellipsodon	extinct	65.11	65.59
Elphidotarsius	extinct	60	60.79
Elphidotarsius	extinct	60	60.79
Elphidotarsius	extinct	60	60.79
Elphidotarsius	extinct	61.7	62.1
Elphidotarsius	extinct	61.7	62.1
Elphidotarsius	extinct	61.7	62.1
Elphidotarsius	extinct	61.7	62.1
Elphidotarsius	extinct	61.7	62.1
Elphidotarsius	extinct	61.7	62.1
Elphidotarsius	extinct	62.5	63.39
Elpidophorus	extinct	58.9	59.99
Elpidophorus	extinct	58.9	59.99
Elpidophorus	extinct	58.9	59.99
Elpidophorus	extinct	60	60.79
Elpidophorus	extinct	60	60.79
Elpidophorus	extinct	60	60.79
Elpidophorus	extinct	60	60.79
Elpidophorus	extinct	60	60.79
Elpidophorus	extinct	60	60.79
Elpidophorus	extinct	60.08	61.9
Elpidophorus	extinct	61.7	62.1
Elpidophorus	extinct	61.7	62.1
Elpidophorus	extinct	62.5	63.39
Elpidophorus	extinct	62.5	63.39
Elpidophorus	extinct	62.5	63.39
Entomolestes	extinct	58.9	59.99
Eoconodon	extinct	63.11	65.12
Eoconodon	extinct	63.11	65.12
Eoconodon	extinct	63.11	65.12
Eoconodon	extinct	65.11	65.59
Eoconodon	extinct	65.11	65.59
Eoconodon	extinct	65.6	65.96
Eoconodon	extinct	65.6	65.96
Eoconodon	extinct	65.6	65.96
Eoconodon	extinct	65.6	65.96
Eoconodon	extinct	65.6	65.96
Eoconodon	extinct	65.6	65.96
Eoconodon	extinct	65.97	66.03
Eoconodon	extinct	65.97	66.03
Escatepos	extinct	65.6	65.96
Esthonyx	extinct	55.85	56.49
Esthonyx	extinct	55.85	56.49
Esthonyx	extinct	55.85	56.49
Esthonyx	extinct	55.85	56.49
Esthonyx	extinct	56.5	56.95
Esthonyx	extinct	56.5	56.95
Esthonyx	extinct	56.96	57.39
Eudaemonema	extinct	57.7	58.89
Eudaemonema	extinct	60	60.79
Eudaemonema	extinct	60	60.79
Eudaemonema	extinct	61.7	62.1
Eudaemonema	extinct	62.11	62.49
Eudaemonema	extinct	62.11	62.49
Eudaemonema	extinct	62.11	62.49
Eudaemonema	extinct	62.5	63.39
Eudaemonema	extinct	62.5	63.39
Eudaemonema	extinct	62.5	63.39
Eudaemonema	extinct	62.5	63.39
Franimys	extinct	56.5	56.95
Franimys	extinct	56.5	56.95
Gelastops	extinct	60	60.79
Gelastops	extinct	60	60.79
Gelastops	extinct	61.7	62.1
Gelastops	extinct	61.7	62.1
Gelastops	extinct	61.7	62.1
Gelastops	extinct	62.11	62.49
Gelastops	extinct	62.11	62.49
Gelastops	extinct	62.11	62.49
Gelastops	extinct	62.11	62.49
Gelastops	extinct	62.5	63.39
Gelastops	extinct	62.5	63.39
Gelastops	extinct	62.5	63.39
Gelastops	extinct	62.5	63.39
Gelastops	extinct	62.5	63.39
Gelastops	extinct	63.11	65.12
Gingerichia	extinct	61.7	62.1
Gingerichia	extinct	61.7	62.1
Gingerichia	extinct	61.7	62.1
Gingerichia	extinct	61.7	62.1
Goniacodon	extinct	61.7	62.1
Goniacodon	extinct	61.7	62.1
Goniacodon	extinct	62.11	62.49
Goniacodon	extinct	62.5	63.39
Goniacodon	extinct	62.5	63.39
Goniacodon	extinct	62.5	63.39
Goniacodon	extinct	62.5	63.39
Goniacodon	extinct	62.5	63.39
Goniacodon	extinct	62.5	63.39
Goniacodon	extinct	62.5	63.39
Goniacodon	extinct	62.5	63.39
Goniacodon	extinct	62.5	63.39
Goniacodon	extinct	62.5	63.39
Goniacodon	extinct	62.5	63.39
Goniacodon	extinct	63.11	65.12
Gypsonictops	extinct	66.04	69.9
Gypsonictops	extinct	66.04	69.9
Gypsonictops	extinct	66.04	69.9
Gypsonictops	extinct	66.04	69.9
Gypsonictops	extinct	66.04	69.9
Gypsonictops	extinct	66.04	69.9
Gypsonictops	extinct	66.04	69.9
Gypsonictops	extinct	66.04	69.9
Gypsonictops	extinct	66.04	69.9
Gypsonictops	extinct	66.04	69.9
Gypsonictops	extinct	66.04	69.9
Gypsonictops	extinct	66.04	69.9
Gypsonictops	extinct	66.04	69.9
Gypsonictops	extinct	66.04	69.9
Gypsonictops	extinct	66.04	69.9
Gypsonictops	extinct	66.04	69.9
Gypsonictops	extinct	66.04	69.9
Gypsonictops	extinct	66.04	69.9
Haplaletes	extinct	57.7	58.89
Haplaletes	extinct	57.7	58.89
Haplaletes	extinct	58.9	59.99
Haplaletes	extinct	60	60.79
Haplaletes	extinct	60	60.79
Haplaletes	extinct	60.08	61.9
Haplaletes	extinct	61.7	62.1
Haplaletes	extinct	61.7	62.1
Haplaletes	extinct	62.11	62.49
Haplaletes	extinct	62.11	62.49
Haplaletes	extinct	62.5	63.39
Haplaletes	extinct	62.5	63.39
Haplaletes	extinct	62.5	63.39
Haplaletes	extinct	62.5	63.39
Haplaletes	extinct	62.5	63.39
Haploconus	extinct	62.5	63.39
Haploconus	extinct	62.5	63.39
Haploconus	extinct	62.5	63.39
Haploconus	extinct	62.5	63.39
Haploconus	extinct	62.5	63.39
Haploconus	extinct	62.5	63.39
Haploconus	extinct	62.5	63.39
Haploconus	extinct	63.11	65.12
Haploconus	extinct	63.11	65.12
Haploconus	extinct	65.11	65.59
Haploconus	extinct	65.6	65.96
Haplolambda	extinct	56.5	56.95
Haplolambda	extinct	58.9	59.99
Haplolambda	extinct	58.9	59.99
Haplomylus	extinct	55.85	56.49
Haplomylus	extinct	55.85	56.49
Haplomylus	extinct	55.85	56.49
Haplomylus	extinct	55.85	56.49
Haplomylus	extinct	56.5	56.95
Haplomylus	extinct	56.5	56.95
Haplomylus	extinct	56.5	56.95
Haplomylus	extinct	56.5	56.95
Haplomylus	extinct	56.96	57.39
Haplomylus	extinct	56.96	57.39
Haplomylus	extinct	57.7	58.89
Hemithlaeus	extinct	60	60.79
Hemithlaeus	extinct	65.6	65.96
Hemithlaeus	extinct	65.6	65.96
Hemithlaeus	extinct	65.6	65.96
Horolodectes	extinct	60	60.79
Horolodectes	extinct	60	60.79
Horolodectes	extinct	61.7	62.1
Huerfanodon	extinct	62.5	63.39
Hyopsodus	extinct	55.85	56.49
Ignacius	extinct	56.5	56.95
Ignacius	extinct	56.5	56.95
Ignacius	extinct	57.7	58.89
Ignacius	extinct	57.7	58.89
Ignacius	extinct	57.7	58.89
Ignacius	extinct	58.9	59.99
Ignacius	extinct	58.9	59.99
Ignacius	extinct	58.9	59.99
Ignacius	extinct	58.9	59.99
Ignacius	extinct	58.9	59.99
Ignacius	extinct	58.9	59.99
Ignacius	extinct	58.9	59.99
Ignacius	extinct	58.9	59.99
Ignacius	extinct	58.9	59.99
Ignacius	extinct	58.9	59.99
Ignacius	extinct	58.9	59.99
Ignacius	extinct	58.9	59.99
Ignacius	extinct	60	60.79
Ignacius	extinct	60	60.79
Ignacius	extinct	60	60.79
Ignacius	extinct	60	60.79
Ignacius	extinct	60	60.79
Ignacius	extinct	60	60.79
Ignacius	extinct	60	60.79
Ignacius	extinct	60	60.79
Ignacius	extinct	60.08	61.9
Ignacius	extinct	61.7	62.1
Ignacius	extinct	61.7	62.1
Ignacius	extinct	61.7	62.1
Ignacius	extinct	61.7	62.1
Ignacius	extinct	62.11	62.49
Ignacius	extinct	62.5	63.39
Ignacius	extinct	62.5	63.39
Ignacius	extinct	62.5	63.39
Insidioclaenus	extinct	60	60.79
Insidioclaenus	extinct	60	60.79
Insidioclaenus	extinct	61.7	62.1
Insidioclaenus	extinct	61.7	62.1
Intyrictis	extinct	61.7	62.1
Intyrictis	extinct	62.11	62.49
Intyrictis	extinct	62.11	62.49
Intyrictis	extinct	62.5	63.39
Intyrictis	extinct	62.5	63.39
Jepsenella	extinct	57.7	58.89
Jepsenella	extinct	62.11	62.49
Jepsenella	extinct	62.5	63.39
Jepsenella	extinct	62.5	63.39
Jepsenella	extinct	62.5	63.39
Joffrelambda	extinct	60	60.79
Joffrelambda	extinct	60	60.79
Joffrelambda	extinct	61.7	62.1
Labidolemur	extinct	55.85	56.49
Labidolemur	extinct	56.5	56.95
Labidolemur	extinct	56.96	57.39
Labidolemur	extinct	56.96	57.39
Labidolemur	extinct	57.7	58.89
Labidolemur	extinct	58.9	59.99
Labidolemur	extinct	58.9	59.99
Labidolemur	extinct	58.9	59.99
Labidolemur	extinct	58.9	59.99
Labidolemur	extinct	58.9	59.99
Labidolemur	extinct	60	60.79
Labidolemur	extinct	60	60.79
Labidolemur	extinct	60.08	61.9
Lainoryctes	extinct	57.7	58.89
Lambertocyon	extinct	56.5	56.95
Lambertocyon	extinct	57.7	58.89
Lambertocyon	extinct	57.7	58.89
Lambertocyon	extinct	58.9	59.99
Lambertocyon	extinct	58.9	59.99
Lambertocyon	extinct	58.9	59.99
Lambertocyon	extinct	58.9	59.99
Lambertocyon	extinct	60	60.79
Leipsanolestes	extinct	55.85	56.49
Leipsanolestes	extinct	56.5	56.95
Leipsanolestes	extinct	56.5	56.95
Leipsanolestes	extinct	56.96	57.39
Leipsanolestes	extinct	56.96	57.39
Leptacodon	extinct	57.7	58.89
Leptacodon	extinct	57.7	58.89
Leptacodon	extinct	57.7	58.89
Leptacodon	extinct	57.7	58.89
Leptacodon	extinct	58.9	59.99
Leptacodon	extinct	58.9	59.99
Leptacodon	extinct	58.9	59.99
Leptacodon	extinct	58.9	59.99
Leptacodon	extinct	58.9	59.99
Leptacodon	extinct	58.9	59.99
Leptacodon	extinct	58.9	59.99
Leptacodon	extinct	58.9	59.99
Leptacodon	extinct	60	60.79
Leptacodon	extinct	60	60.79
Leptacodon	extinct	60	60.79
Leptacodon	extinct	60	60.79
Leptacodon	extinct	60	60.79
Leptacodon	extinct	60	60.79
Leptacodon	extinct	60.08	61.9
Leptacodon	extinct	62.5	63.39
Leptacodon_x	extinct	57.7	58.89
Leptacodon_x	extinct	57.7	58.89
Leptacodon_x	extinct	57.7	58.89
Leptacodon_x	extinct	57.7	58.89
Leptacodon_x	extinct	60	60.79
Leptacodon_x	extinct	60	60.79
Leptacodon_x	extinct	60	60.79
Leptacodon_x	extinct	60	60.79
Leptacodon_x	extinct	60	60.79
Leptacodon_x	extinct	60	60.79
Leptacodon_x	extinct	61.7	62.1
Leptacodon_x	extinct	61.7	62.1
Leptacodon_x	extinct	61.7	62.1
Leptacodon_x	extinct	62.5	63.39
Leptacodon_x	extinct	62.5	63.39
Leptolambda	extinct	58.9	59.99
Leptolambda	extinct	58.9	59.99
Leptonysson	extinct	58.9	59.99
Leptonysson	extinct	60	60.79
Limaconyssus	extinct	56.96	57.39
Limaconyssus	extinct	57.7	58.89
Limaconyssus	extinct	58.9	59.99
Limaconyssus	extinct	60	60.79
Limaconyssus	extinct	60	60.79
Limaconyssus	extinct	61.7	62.1
Limaconyssus	extinct	62.5	63.39
Litaletes	extinct	61.7	62.1
Litaletes	extinct	62.11	62.49
Litaletes	extinct	62.11	62.49
Litaletes	extinct	62.5	63.39
Litaletes	extinct	62.5	63.39
Litaletes	extinct	62.5	63.39
Litaletes	extinct	63.11	65.12
Litaletes	extinct	63.11	65.12
Litaletes	extinct	65.6	65.96
Litaletes	extinct	65.6	65.96
Litocherus	extinct	57.7	58.89
Litocherus	extinct	58.9	59.99
Litocherus	extinct	58.9	59.99
Litocherus	extinct	58.9	59.99
Litocherus	extinct	58.9	59.99
Litocherus	extinct	60	60.79
Litocherus	extinct	60	60.79
Litocherus	extinct	60	60.79
Litocherus	extinct	60	60.79
Litocherus	extinct	60	60.79
Litocherus	extinct	60	60.79
Litocherus	extinct	60	60.79
Litocherus	extinct	60	60.79
Litocherus	extinct	60	60.79
Litocherus	extinct	60.08	61.9
Litocherus	extinct	60.08	61.9
Litocherus	extinct	61.7	62.1
Litocherus	extinct	61.7	62.1
Litocherus	extinct	62.11	62.49
Litocherus	extinct	62.11	62.49
Litolestes	extinct	57.7	58.89
Litolestes	extinct	57.7	58.89
Litolestes	extinct	57.7	58.89
Litolestes	extinct	57.7	58.89
Litolestes	extinct	57.7	58.89
Litolestes	extinct	57.7	58.89
Litolestes	extinct	58.9	59.99
Litolestes	extinct	58.9	59.99
Litolestes	extinct	58.9	59.99
Litolestes	extinct	58.9	59.99
Litolestes	extinct	58.9	59.99
Litolestes	extinct	58.9	59.99
Litolestes	extinct	58.9	59.99
Litolestes	extinct	58.9	59.99
Litolestes	extinct	60	60.79
Litolestes	extinct	60	60.79
Litolestes	extinct	60	60.79
Litomylus	extinct	57.7	58.89
Litomylus	extinct	57.7	58.89
Litomylus	extinct	58.9	59.99
Litomylus	extinct	58.9	59.99
Litomylus	extinct	58.9	59.99
Litomylus	extinct	60	60.79
Litomylus	extinct	60	60.79
Litomylus	extinct	60	60.79
Litomylus	extinct	60	60.79
Litomylus	extinct	60.08	61.9
Litomylus	extinct	61.7	62.1
Litomylus	extinct	61.7	62.1
Litomylus	extinct	61.7	62.1
Litomylus	extinct	61.7	62.1
Litomylus	extinct	61.7	62.1
Litomylus	extinct	61.7	62.1
Litomylus	extinct	62.11	62.49
Litomylus	extinct	62.11	62.49
Litomylus	extinct	62.11	62.49
Litomylus	extinct	62.11	62.49
Litomylus	extinct	62.11	62.49
Litomylus	extinct	62.11	62.49
Litomylus	extinct	62.11	62.49
Litomylus	extinct	62.5	63.39
Litomylus	extinct	62.5	63.39
Litomylus	extinct	62.5	63.39
Litomylus	extinct	62.5	63.39
Litomylus	extinct	62.5	63.39
Litomylus	extinct	65.11	65.59
Litomylus	extinct	65.6	65.96
Loxolophus	extinct	62.5	63.39
Loxolophus	extinct	63.11	65.12
Loxolophus	extinct	65.11	65.59
Loxolophus	extinct	65.11	65.59
Loxolophus	extinct	65.11	65.59
Loxolophus	extinct	65.11	65.59
Loxolophus	extinct	65.11	65.59
Loxolophus	extinct	65.6	65.96
Loxolophus	extinct	65.6	65.96
Loxolophus	extinct	65.6	65.96
Loxolophus	extinct	65.6	65.96
Loxolophus	extinct	65.6	65.96
Loxolophus	extinct	65.6	65.96
Loxolophus	extinct	65.6	65.96
Loxolophus	extinct	65.6	65.96
Loxolophus	extinct	65.6	65.96
Maiorana	extinct	65.97	66.03
Maiorana	extinct	65.97	66.03
Mckennatherium	extinct	62.11	62.49
Mckennatherium	extinct	62.11	62.49
Mckennatherium	extinct	62.11	62.49
Mckennatherium	extinct	62.5	63.39
Mckennatherium	extinct	62.5	63.39
Mckennatherium	extinct	62.5	63.39
Mckennatherium	extinct	62.5	63.39
Melaniella	extinct	60	60.79
Mentoclaenodon	extinct	60.08	61.9
Micromomys	extinct	57.7	58.89
Micromomys	extinct	57.7	58.89
Micromomys	extinct	57.7	58.89
Micromomys	extinct	58.9	59.99
Micromomys	extinct	60	60.79
Microparamys	extinct	56.5	56.95
Microsyops	extinct	55.85	56.49
Microsyops	extinct	55.85	56.49
Microsyops	extinct	56.5	56.95
Microsyops	extinct	58.9	59.99
Mimatuta	extinct	65.6	65.96
Mimatuta	extinct	65.97	66.03
Mimatuta	extinct	65.97	66.03
Mimatuta	extinct	65.97	66.03
Mimatuta	extinct	65.97	66.03
Mimatuta	extinct	65.97	66.03
Mimatuta	extinct	65.97	66.03
Mimotricentes	extinct	60	60.79
Mimotricentes	extinct	60	60.79
Mimotricentes	extinct	60	60.79
Mimotricentes	extinct	60.08	61.9
Mimotricentes	extinct	61.7	62.1
Mimotricentes	extinct	61.7	62.1
Mimotricentes	extinct	62.11	62.49
Mimotricentes	extinct	62.11	62.49
Mimotricentes	extinct	62.11	62.49
Mimotricentes	extinct	62.11	62.49
Mimotricentes	extinct	62.11	62.49
Mimotricentes	extinct	62.5	63.39
Mimotricentes	extinct	62.5	63.39
Mimotricentes	extinct	62.5	63.39
Mimotricentes	extinct	62.5	63.39
Mimotricentes	extinct	62.5	63.39
Mimotricentes	extinct	62.5	63.39
Mimotricentes	extinct	62.5	63.39
Mimotricentes	extinct	62.5	63.39
Mimotricentes	extinct	62.5	63.39
Mimotricentes	extinct	62.5	63.39
Mimotricentes	extinct	63.11	65.12
Mimotricentes	extinct	63.11	65.12
Mimotricentes	extinct	63.11	65.12
Mimotricentes	extinct	63.11	65.12
Mimotricentes	extinct	63.11	65.12
Mingotherium	extinct	57.7	58.89
Mioclaenus	extinct	57.7	58.89
Mioclaenus	extinct	60.08	61.9
Mioclaenus	extinct	61.7	62.1
Mioclaenus	extinct	62.11	62.49
Mioclaenus	extinct	62.11	62.49
Mioclaenus	extinct	62.11	62.49
Mioclaenus	extinct	62.5	63.39
Mioclaenus	extinct	62.5	63.39
Mioclaenus	extinct	62.5	63.39
Mioclaenus	extinct	62.5	63.39
Mioclaenus	extinct	62.5	63.39
Mioclaenus	extinct	62.5	63.39
Mioclaenus	extinct	62.5	63.39
Mioclaenus	extinct	63.11	65.12
Mioclaenus	extinct	63.11	65.12
Mioclaenus	extinct	63.11	65.12
Mithrandir	extinct	65.11	65.59
Mithrandir	extinct	65.11	65.59
Mithrandir	extinct	65.6	65.96
Mithrandir	extinct	65.6	65.96
Mithrandir	extinct	65.6	65.96
Mithrandir	extinct	65.6	65.96
Mixodectes	extinct	60	60.79
Mixodectes	extinct	62.11	62.49
Mixodectes	extinct	62.11	62.49
Mixodectes	extinct	62.11	62.49
Mixodectes	extinct	62.5	63.39
Mixodectes	extinct	62.5	63.39
Mixodectes	extinct	62.5	63.39
Mixodectes	extinct	62.5	63.39
Mixodectes	extinct	62.5	63.39
Mixodectes	extinct	62.5	63.39
Mixodectes	extinct	63.11	65.12
Mylanodon	extinct	57.7	58.89
Myrmecoboides	extinct	60	60.79
Myrmecoboides	extinct	61.7	62.1
Myrmecoboides	extinct	61.7	62.1
Myrmecoboides	extinct	61.7	62.1
Myrmecoboides	extinct	62.5	63.39
Myrmecoboides	extinct	62.5	63.39
Nannodectes	extinct	57.7	58.89
Nannodectes	extinct	57.7	58.89
Nannodectes	extinct	57.7	58.89
Nannodectes	extinct	58.9	59.99
Nannodectes	extinct	58.9	59.99
Nannodectes	extinct	58.9	59.99
Nannodectes	extinct	58.9	59.99
Nannodectes	extinct	60	60.79
Nannodectes	extinct	60	60.79
Nannodectes	extinct	60	60.79
Nannodectes	extinct	60	60.79
Nannodectes	extinct	60.08	61.9
Nannodectes	extinct	60.08	61.9
Nannodectes	extinct	61.7	62.1
Nannodectes	extinct	61.7	62.1
Nannodectes	extinct	61.7	62.1
Nannodectes	extinct	61.7	62.1
Nannodectes	extinct	61.7	62.1
Nannodectes	extinct	61.7	62.1
Navajovius	extinct	57.7	58.89
Navajovius	extinct	58.9	59.99
Navajovius	extinct	58.9	59.99
Navajovius	extinct	58.9	59.99
Navajovius	extinct	60	60.79
Navajovius	extinct	60	60.79
Navajovius	extinct	62.11	62.49
Navajovius	extinct	62.5	63.39
Navajovius	extinct	62.5	63.39
Nayloria	extinct	60	60.79
Nayloria	extinct	60	60.79
Nayloria	extinct	60	60.79
Niptomomys	extinct	56.5	56.95
Niptomomys	extinct	56.5	56.95
Nortedelphys	extinct	66.04	69.9
Nortedelphys	extinct	66.04	69.9
Nortedelphys	extinct	66.04	69.9
Nortedelphys	extinct	66.04	69.9
Nortedelphys	extinct	66.04	69.9
Nortedelphys	extinct	66.04	69.9
Nortedelphys	extinct	66.04	69.9
Nortedelphys	extinct	66.04	69.9
Nyctitherium	extinct	58.9	59.99
Nyctitherium	extinct	58.9	59.99
Nyctitherium	extinct	60	60.79
Oncocherus	extinct	58.9	59.99
Oncocherus	extinct	58.9	59.99
Oncocherus	extinct	58.9	59.99
Onychodectes	extinct	65.11	65.59
Onychodectes	extinct	65.11	65.59
Onychodectes	extinct	65.6	65.96
Onychodectes	extinct	65.6	65.96
Oxyacodon	extinct	65.11	65.59
Oxyacodon	extinct	65.11	65.59
Oxyacodon	extinct	65.11	65.59
Oxyacodon	extinct	65.6	65.96
Oxyacodon	extinct	65.6	65.96
Oxyacodon	extinct	65.6	65.96
Oxyacodon	extinct	65.6	65.96
Oxyacodon	extinct	65.6	65.96
Oxyacodon	extinct	65.97	66.03
Oxyacodon	extinct	65.97	66.03
Oxyacodon	extinct	65.97	66.03
Oxyclaenus	extinct	62.11	62.49
Oxyclaenus	extinct	62.5	63.39
Oxyclaenus	extinct	62.5	63.39
Oxyclaenus	extinct	62.5	63.39
Oxyclaenus_x	extinct	63.11	65.12
Oxyclaenus_x	extinct	63.11	65.12
Oxyclaenus_x	extinct	63.11	65.12
Oxyclaenus_x	extinct	65.11	65.59
Oxyclaenus_x	extinct	65.11	65.59
Oxyclaenus_x	extinct	65.11	65.59
Oxyclaenus_x	extinct	65.6	65.96
Oxyclaenus_x	extinct	65.6	65.96
Oxyclaenus_x	extinct	65.6	65.96
Oxyclaenus_x	extinct	65.97	66.03
Oxyprimus	extinct	61.7	62.1
Oxyprimus	extinct	65.11	65.59
Oxyprimus	extinct	65.97	66.03
Oxyprimus	extinct	65.97	66.03
Oxyprimus	extinct	65.97	66.03
Oxyprimus	extinct	65.97	66.03
Oxyprimus	extinct	65.97	66.03
Oxyprimus	extinct	66.04	69.9
Oxytomodon	extinct	63.11	65.12
Oxytomodon	extinct	63.11	65.12
Pachyaena	extinct	60	60.79
Pagonomus	extinct	58.9	59.99
Palaeanodon	extinct	55.85	56.49
Palaeanodon	extinct	56.96	57.39
Palaechthon	extinct	60	60.79
Palaechthon	extinct	61.7	62.1
Palaechthon	extinct	61.7	62.1
Palaechthon	extinct	61.7	62.1
Palaechthon	extinct	61.7	62.1
Palaechthon	extinct	62.11	62.49
Palaechthon	extinct	62.11	62.49
Palaechthon	extinct	62.11	62.49
Palaechthon	extinct	62.5	63.39
Palaechthon	extinct	62.5	63.39
Palaechthon	extinct	62.5	63.39
Palaechthon	extinct	62.5	63.39
Palaechthon	extinct	63.11	65.12
Palaechthon	extinct	63.11	65.12
Palaechthon	extinct	63.11	65.12
Palaeictops	extinct	57.7	58.89
Palaeictops	extinct	57.7	58.89
Palaeictops	extinct	57.7	58.89
Palaeictops	extinct	57.7	58.89
Palaeictops	extinct	62.5	63.39
Palaeonictis	extinct	55.85	56.49
Palaeonictis	extinct	55.85	56.49
Palaeonictis	extinct	56.5	56.95
Palaeoryctes	extinct	56.5	56.95
Palaeoryctes	extinct	56.5	56.95
Palaeoryctes	extinct	56.96	57.39
Palaeoryctes	extinct	57.7	58.89
Palaeoryctes	extinct	57.7	58.89
Palaeoryctes	extinct	57.7	58.89
Palaeoryctes	extinct	58.9	59.99
Palaeoryctes	extinct	58.9	59.99
Palaeoryctes	extinct	58.9	59.99
Palaeoryctes	extinct	58.9	59.99
Palaeoryctes	extinct	58.9	59.99
Palaeoryctes	extinct	58.9	59.99
Palaeoryctes	extinct	60	60.79
Palaeoryctes	extinct	60	60.79
Palaeoryctes	extinct	60	60.79
Palaeoryctes	extinct	61.7	62.1
Palaeoryctes	extinct	62.11	62.49
Palaeoryctes	extinct	62.11	62.49
Palaeoryctes	extinct	62.5	63.39
Palaeoryctes	extinct	62.5	63.39
Palaeosinopa	extinct	55.85	56.49
Palaeosinopa	extinct	56.5	56.95
Palaeosinopa	extinct	56.5	56.95
Palaeosinopa	extinct	56.5	56.95
Palaeosinopa	extinct	56.96	57.39
Palaeosinopa	extinct	56.96	57.39
Palaeosinopa	extinct	57.7	58.89
Palaeosinopa	extinct	58.9	59.99
Palaeosinopa	extinct	58.9	59.99
Palaeosinopa	extinct	58.9	59.99
Palaeosinopa	extinct	58.9	59.99
Palaeosinopa	extinct	58.9	59.99
Palaeosinopa	extinct	60.08	61.9
Palaeoungulatum	extinct	66.04	69.9
Palenochtha	extinct	61.7	62.1
Palenochtha	extinct	61.7	62.1
Palenochtha	extinct	62.11	62.49
Palenochtha	extinct	62.11	62.49
Palenochtha	extinct	62.5	63.39
Palenochtha	extinct	62.5	63.39
Palenochtha	extinct	62.5	63.39
Palenochtha	extinct	62.5	63.39
Paleotomus	extinct	57.7	58.89
Paleotomus	extinct	58.9	59.99
Paleotomus	extinct	58.9	59.99
Paleotomus	extinct	60	60.79
Paleotomus	extinct	60	60.79
Paleotomus	extinct	60	60.79
Paleotomus	extinct	60	60.79
Paleotomus	extinct	60	60.79
Paleotomus	extinct	60.08	61.9
Paleotomus	extinct	61.7	62.1
Paleotomus	extinct	61.7	62.1
Paleotomus	extinct	61.7	62.1
Paleotomus	extinct	61.7	62.1
Paleotomus	extinct	61.7	62.1
Paleotomus	extinct	61.7	62.1
Paleotomus	extinct	62.11	62.49
Paleotomus	extinct	62.5	63.39
Paleotomus	extinct	62.5	63.39
Pandemonium	extinct	65.11	65.59
Pandemonium	extinct	65.6	65.96
Pantolambda	extinct	61.7	62.1
Pantolambda	extinct	61.7	62.1
Pantolambda	extinct	61.7	62.1
Pantolambda	extinct	62.11	62.49
Pantolambda	extinct	62.11	62.49
Pantolambda	extinct	62.11	62.49
Pantolambda	extinct	62.11	62.49
Pantolambda	extinct	62.5	63.39
Pantolambda	extinct	62.5	63.39
Pantolambda	extinct	62.5	63.39
Pantolambda	extinct	62.5	63.39
Pantolambda	extinct	62.5	63.39
Pantolambda	extinct	62.5	63.39
Pantolambda	extinct	62.5	63.39
Paramys	extinct	55.85	56.49
Paramys	extinct	55.85	56.49
Paramys	extinct	56.5	56.95
Paramys	extinct	56.5	56.95
Paramys	extinct	56.5	56.95
Paramys	extinct	56.5	56.95
Paramys	extinct	56.5	56.95
Paramys	extinct	56.96	57.39
Paramys	extinct	56.96	57.39
Paranyctoides	extinct	66.04	69.9
Pararyctes	extinct	58.9	59.99
Pararyctes	extinct	58.9	59.99
Pararyctes	extinct	60	60.79
Pararyctes	extinct	60	60.79
Pararyctes	extinct	60	60.79
Pararyctes	extinct	60	60.79
Pararyctes	extinct	60	60.79
Pararyctes	extinct	60	60.79
Pararyctes	extinct	60.08	61.9
Pararyctes	extinct	60.08	61.9
Pararyctes	extinct	61.7	62.1
Pararyctes	extinct	61.7	62.1
Pararyctes	extinct	62.5	63.39
Paromomys	extinct	60	60.79
Paromomys	extinct	60	60.79
Paromomys	extinct	61.7	62.1
Paromomys	extinct	61.7	62.1
Paromomys	extinct	62.11	62.49
Paromomys	extinct	62.11	62.49
Paromomys	extinct	62.5	63.39
Paromomys	extinct	62.5	63.39
Paromomys	extinct	62.5	63.39
Paromomys	extinct	62.5	63.39
Paromomys	extinct	63.11	65.12
Paromomys	extinct	63.11	65.12
Paromomys	extinct	63.11	65.12
Paromomys	extinct	63.11	65.12
Pentacodon	extinct	61.7	62.1
Pentacodon	extinct	62.11	62.49
Pentacodon	extinct	62.11	62.49
Pentacodon	extinct	62.5	63.39
Pentacodon	extinct	62.5	63.39
Pentacodon	extinct	62.5	63.39
Pentacodon	extinct	62.5	63.39
Periptychus	extinct	60	60.79
Periptychus	extinct	61.7	62.1
Periptychus	extinct	61.7	62.1
Periptychus	extinct	61.7	62.1
Periptychus	extinct	61.7	62.1
Periptychus	extinct	62.11	62.49
Periptychus	extinct	62.11	62.49
Periptychus	extinct	62.11	62.49
Periptychus	extinct	62.11	62.49
Periptychus	extinct	62.5	63.39
Periptychus	extinct	62.5	63.39
Periptychus	extinct	62.5	63.39
Periptychus	extinct	62.5	63.39
Periptychus	extinct	62.5	63.39
Periptychus	extinct	62.5	63.39
Periptychus	extinct	62.5	63.39
Periptychus	extinct	62.5	63.39
Periptychus	extinct	62.5	63.39
Periptychus	extinct	62.5	63.39
Periptychus	extinct	62.5	63.39
Periptychus	extinct	62.5	63.39
Periptychus	extinct	62.5	63.39
Periptychus	extinct	63.11	65.12
Periptychus	extinct	63.11	65.12
Periptychus	extinct	63.11	65.12
Periptychus	extinct	63.11	65.12
Periptychus	extinct	63.11	65.12
Periptychus	extinct	63.11	65.12
Periptychus	extinct	65.11	65.59
Periptychus	extinct	65.11	65.59
Periptychus	extinct	65.6	65.96
Periptychus	extinct	65.6	65.96
Periptychus	extinct	65.6	65.96
Periptychus	extinct	65.6	65.96
Periptychus	extinct	65.6	65.96
Periptychus	extinct	65.6	65.96
Phenacodaptes	extinct	56.5	56.95
Phenacodaptes	extinct	56.96	57.39
Phenacodaptes	extinct	56.96	57.39
Phenacodaptes	extinct	57.7	58.89
Phenacodaptes	extinct	57.7	58.89
Phenacodaptes	extinct	57.7	58.89
Phenacodaptes	extinct	57.7	58.89
Phenacodaptes	extinct	58.9	59.99
Phenacodaptes	extinct	58.9	59.99
Phenacodus	extinct	55.85	56.49
Phenacodus	extinct	55.85	56.49
Phenacodus	extinct	56.5	56.95
Phenacodus	extinct	56.5	56.95
Phenacodus	extinct	56.5	56.95
Phenacodus	extinct	56.5	56.95
Phenacodus	extinct	56.5	56.95
Phenacodus	extinct	56.5	56.95
Phenacodus	extinct	56.5	56.95
Phenacodus	extinct	56.5	56.95
Phenacodus	extinct	56.5	56.95
Phenacodus	extinct	56.5	56.95
Phenacodus	extinct	56.96	57.39
Phenacodus	extinct	56.96	57.39
Phenacodus	extinct	56.96	57.39
Phenacodus	extinct	57.4	57.69
Phenacodus	extinct	57.7	58.89
Phenacodus	extinct	57.7	58.89
Phenacodus	extinct	57.7	58.89
Phenacodus	extinct	57.7	58.89
Phenacodus	extinct	57.7	58.89
Phenacodus	extinct	57.7	58.89
Phenacodus	extinct	58.9	59.99
Phenacodus	extinct	58.9	59.99
Phenacodus	extinct	58.9	59.99
Phenacodus	extinct	58.9	59.99
Phenacodus	extinct	58.9	59.99
Phenacodus	extinct	58.9	59.99
Phenacodus	extinct	58.9	59.99
Phenacodus	extinct	58.9	59.99
Phenacodus	extinct	58.9	59.99
Phenacodus	extinct	58.9	59.99
Phenacodus	extinct	58.9	59.99
Phenacodus	extinct	60	60.79
Phenacodus	extinct	60	60.79
Phenacodus	extinct	60	60.79
Phenacodus	extinct	60	60.79
Phenacodus	extinct	60	60.79
Phenacodus	extinct	60	60.79
Phenacodus	extinct	60	60.79
Phenacodus	extinct	60	60.79
Phenacodus	extinct	60.08	61.9
Phenacodus	extinct	60.08	61.9
Phenacodus	extinct	60.08	61.9
Phenacodus	extinct	61.7	62.1
Phenacodus	extinct	61.7	62.1
Phenacodus	extinct	61.7	62.1
Phenacodus	extinct	62.11	62.49
Phenacodus	extinct	62.5	63.39
Phenacolemur	extinct	55.85	56.49
Phenacolemur	extinct	55.85	56.49
Phenacolemur	extinct	56.5	56.95
Phenacolemur	extinct	56.5	56.95
Phenacolemur	extinct	56.5	56.95
Phenacolemur	extinct	56.5	56.95
Phenacolemur	extinct	56.96	57.39
Phenacolemur	extinct	56.96	57.39
Phenacolemur	extinct	56.96	57.39
Phenacolemur	extinct	57.4	57.69
Phenacolemur	extinct	57.7	58.89
Phenacolemur	extinct	57.7	58.89
Phenacolemur	extinct	57.7	58.89
Phenacolemur	extinct	57.7	58.89
Phenacolemur	extinct	57.7	58.89
Phenacolemur	extinct	57.7	58.89
Phenacolemur	extinct	58.9	59.99
Phenacolemur	extinct	58.9	59.99
Phenacolemur	extinct	58.9	59.99
Phenacolemur	extinct	58.9	59.99
Phenacolemur	extinct	58.9	59.99
Phenacolemur	extinct	58.9	59.99
Phoxomylus	extinct	61.7	62.1
Picrodus	extinct	57.7	58.89
Picrodus	extinct	58.9	59.99
Picrodus	extinct	60	60.79
Picrodus	extinct	60	60.79
Picrodus	extinct	60	60.79
Picrodus	extinct	60	60.79
Picrodus	extinct	60.08	61.9
Picrodus	extinct	61.7	62.1
Picrodus	extinct	61.7	62.1
Picrodus	extinct	61.7	62.1
Picrodus	extinct	61.7	62.1
Picrodus	extinct	61.7	62.1
Picrodus	extinct	62.11	62.49
Picrodus	extinct	62.11	62.49
Picrodus	extinct	62.5	63.39
Picrodus	extinct	62.5	63.39
Picrodus	extinct	62.5	63.39
Picrodus	extinct	62.5	63.39
Picrodus	extinct	62.5	63.39
Plagioctenodon	extinct	56.5	56.95
Plagioctenodon	extinct	56.5	56.95
Plagioctenodon	extinct	56.96	57.39
Plagioctenodon	extinct	57.7	58.89
Plagiomene	extinct	55.85	56.49
Plagiomene	extinct	55.85	56.49
Plagiomene	extinct	55.85	56.49
Planetetherium	extinct	56.5	56.95
Planetetherium	extinct	56.96	57.39
Planetetherium	extinct	56.96	57.39
Platymastus	extinct	65.6	65.96
Plesiadapis	extinct	55.85	56.49
Plesiadapis	extinct	56.5	56.95
Plesiadapis	extinct	56.5	56.95
Plesiadapis	extinct	56.5	56.95
Plesiadapis	extinct	56.5	56.95
Plesiadapis	extinct	56.5	56.95
Plesiadapis	extinct	56.5	56.95
Plesiadapis	extinct	56.5	56.95
Plesiadapis	extinct	56.5	56.95
Plesiadapis	extinct	56.5	56.95
Plesiadapis	extinct	56.5	56.95
Plesiadapis	extinct	56.5	56.95
Plesiadapis	extinct	56.96	57.39
Plesiadapis	extinct	56.96	57.39
Plesiadapis	extinct	56.96	57.39
Plesiadapis	extinct	57.4	57.69
Plesiadapis	extinct	57.7	58.89
Plesiadapis	extinct	57.7	58.89
Plesiadapis	extinct	57.7	58.89
Plesiadapis	extinct	57.7	58.89
Plesiadapis	extinct	57.7	58.89
Plesiadapis	extinct	57.7	58.89
Plesiadapis	extinct	57.7	58.89
Plesiadapis	extinct	57.7	58.89
Plesiadapis	extinct	57.7	58.89
Plesiadapis	extinct	57.7	58.89
Plesiadapis	extinct	58.9	59.99
Plesiadapis	extinct	58.9	59.99
Plesiadapis	extinct	58.9	59.99
Plesiadapis	extinct	58.9	59.99
Plesiadapis	extinct	58.9	59.99
Plesiadapis	extinct	58.9	59.99
Plesiadapis	extinct	58.9	59.99
Plesiadapis	extinct	58.9	59.99
Plesiadapis	extinct	58.9	59.99
Plesiadapis	extinct	58.9	59.99
Plesiadapis	extinct	58.9	59.99
Plesiadapis	extinct	58.9	59.99
Plesiadapis	extinct	58.9	59.99
Plesiadapis	extinct	58.9	59.99
Plesiadapis	extinct	58.9	59.99
Plesiadapis	extinct	58.9	59.99
Plesiadapis	extinct	60	60.79
Plesiadapis	extinct	60	60.79
Plesiadapis	extinct	60	60.79
Plesiadapis	extinct	60	60.79
Plesiadapis	extinct	60	60.79
Plesiadapis	extinct	60	60.79
Plesiadapis	extinct	60	60.79
Plesiadapis	extinct	60	60.79
Plesiadapis	extinct	60	60.79
Plesiadapis	extinct	60	60.79
Plesiadapis	extinct	60.08	61.9
Plesiadapis	extinct	60.08	61.9
Plesiadapis	extinct	60.08	61.9
Plesiadapis	extinct	60.08	61.9
Plesiadapis	extinct	61.7	62.1
Plesiadapis	extinct	61.7	62.1
Plesiadapis	extinct	61.7	62.1
Plesiadapis	extinct	61.7	62.1
Plesiolestes	extinct	60	60.79
Plesiolestes	extinct	61.7	62.1
Plesiolestes	extinct	61.7	62.1
Plesiolestes	extinct	61.7	62.1
Plesiolestes	extinct	61.7	62.1
Plesiolestes	extinct	62.11	62.49
Plesiolestes	extinct	62.11	62.49
Plesiolestes	extinct	62.11	62.49
Plesiolestes	extinct	62.5	63.39
Plesiolestes	extinct	62.5	63.39
Plesiolestes	extinct	62.5	63.39
Plesiolestes	extinct	62.5	63.39
Presbytherium	extinct	60	60.79
Presbytherium	extinct	62.5	63.39
Princetonia	extinct	56.5	56.95
Princetonia	extinct	57.7	58.89
Princetonia	extinct	57.7	58.89
Princetonia	extinct	57.7	58.89
Pristinictis	extinct	61.7	62.1
Probathyopsis	extinct	55.85	56.49
Probathyopsis	extinct	56.5	56.95
Probathyopsis	extinct	56.5	56.95
Probathyopsis	extinct	56.5	56.95
Probathyopsis	extinct	56.5	56.95
Probathyopsis	extinct	56.96	57.39
Probathyopsis	extinct	56.96	57.39
Probathyopsis	extinct	57.4	57.69
Procerberus	extinct	62.5	63.39
Procerberus	extinct	65.11	65.59
Procerberus	extinct	65.11	65.59
Procerberus	extinct	65.6	65.96
Procerberus	extinct	65.97	66.03
Procerberus	extinct	65.97	66.03
Procerberus	extinct	66.04	69.9
Procerberus	extinct	66.04	69.9
Prodiacodon	extinct	55.85	56.49
Prodiacodon	extinct	56.5	56.95
Prodiacodon	extinct	56.5	56.95
Prodiacodon	extinct	56.5	56.95
Prodiacodon	extinct	57.4	57.69
Prodiacodon	extinct	57.7	58.89
Prodiacodon	extinct	57.7	58.89
Prodiacodon	extinct	58.9	59.99
Prodiacodon	extinct	58.9	59.99
Prodiacodon	extinct	58.9	59.99
Prodiacodon	extinct	58.9	59.99
Prodiacodon	extinct	60	60.79
Prodiacodon	extinct	60	60.79
Prodiacodon	extinct	60.08	61.9
Prodiacodon	extinct	61.7	62.1
Prodiacodon	extinct	61.7	62.1
Prodiacodon	extinct	61.7	62.1
Prodiacodon	extinct	62.11	62.49
Prodiacodon	extinct	62.11	62.49
Prodiacodon	extinct	62.11	62.49
Prodiacodon	extinct	62.11	62.49
Prodiacodon	extinct	62.11	62.49
Prodiacodon	extinct	62.5	63.39
Prodiacodon	extinct	62.5	63.39
Prodiacodon	extinct	62.5	63.39
Prodiacodon	extinct	62.5	63.39
Prodiacodon	extinct	63.11	65.12
Prodiacodon	extinct	63.11	65.12
Prodiacodon	extinct	65.11	65.59
Prodiacodon	extinct	65.11	65.59
Prodiacodon	extinct	65.6	65.96
Prodiacodon	extinct	65.6	65.96
Prodiacodon	extinct	65.6	65.96
Prodiacodon	extinct	65.97	66.03
Prodiacodon	extinct	65.97	66.03
Promioclaenus	extinct	60	60.79
Promioclaenus	extinct	60	60.79
Promioclaenus	extinct	60	60.79
Promioclaenus	extinct	60.08	61.9
Promioclaenus	extinct	60.08	61.9
Promioclaenus	extinct	61.7	62.1
Promioclaenus	extinct	61.7	62.1
Promioclaenus	extinct	61.7	62.1
Promioclaenus	extinct	61.7	62.1
Promioclaenus	extinct	61.7	62.1
Promioclaenus	extinct	61.7	62.1
Promioclaenus	extinct	61.7	62.1
Promioclaenus	extinct	62.11	62.49
Promioclaenus	extinct	62.11	62.49
Promioclaenus	extinct	62.11	62.49
Promioclaenus	extinct	62.11	62.49
Promioclaenus	extinct	62.11	62.49
Promioclaenus	extinct	62.5	63.39
Promioclaenus	extinct	62.5	63.39
Promioclaenus	extinct	62.5	63.39
Promioclaenus	extinct	62.5	63.39
Promioclaenus	extinct	62.5	63.39
Promioclaenus	extinct	62.5	63.39
Promioclaenus	extinct	62.5	63.39
Promioclaenus	extinct	62.5	63.39
Promioclaenus	extinct	62.5	63.39
Promioclaenus	extinct	62.5	63.39
Promioclaenus	extinct	62.5	63.39
Promioclaenus	extinct	62.5	63.39
Promioclaenus	extinct	63.11	65.12
Promioclaenus	extinct	63.11	65.12
Promioclaenus	extinct	63.11	65.12
Promioclaenus	extinct	65.11	65.59
Promioclaenus	extinct	65.11	65.59
Promioclaenus	extinct	65.6	65.96
Promioclaenus	extinct	65.6	65.96
Pronothodectes	extinct	60	60.79
Pronothodectes	extinct	60	60.79
Pronothodectes	extinct	60	60.79
Pronothodectes	extinct	60	60.79
Pronothodectes	extinct	61.7	62.1
Pronothodectes	extinct	61.7	62.1
Pronothodectes	extinct	62.11	62.49
Pronothodectes	extinct	62.11	62.49
Pronothodectes	extinct	62.11	62.49
Pronothodectes	extinct	62.11	62.49
Pronothodectes	extinct	62.5	63.39
Pronothodectes	extinct	62.5	63.39
Pronothodectes	extinct	62.5	63.39
Propalaeanodon	extinct	57.7	58.89
Propalaeanodon	extinct	57.7	58.89
Propalaeanodon	extinct	57.7	58.89
Protentomodon	extinct	56.96	57.39
Protentomodon	extinct	58.9	59.99
Prothryptacodon	extinct	62.11	62.49
Prothryptacodon	extinct	62.11	62.49
Prothryptacodon	extinct	62.5	63.39
Prothryptacodon	extinct	62.5	63.39
Prothryptacodon	extinct	62.5	63.39
Prothryptacodon	extinct	63.11	65.12
Protictis	extinct	57.7	58.89
Protictis	extinct	57.7	58.89
Protictis	extinct	58.9	59.99
Protictis	extinct	58.9	59.99
Protictis	extinct	58.9	59.99
Protictis	extinct	60	60.79
Protictis	extinct	60	60.79
Protictis	extinct	60	60.79
Protictis	extinct	60	60.79
Protictis	extinct	60.08	61.9
Protictis	extinct	61.7	62.1
Protictis	extinct	61.7	62.1
Protictis	extinct	62.11	62.49
Protictis	extinct	62.11	62.49
Protictis	extinct	62.11	62.49
Protictis	extinct	62.11	62.49
Protictis	extinct	62.11	62.49
Protictis	extinct	62.5	63.39
Protictis	extinct	62.5	63.39
Protictis	extinct	62.5	63.39
Protictis	extinct	62.5	63.39
Protictis	extinct	62.5	63.39
Protictis	extinct	62.5	63.39
Protictis	extinct	62.5	63.39
Protictis	extinct	62.5	63.39
Protictis	extinct	62.5	63.39
Protictis	extinct	62.5	63.39
Protictis	extinct	62.5	63.39
Protictis	extinct	63.11	65.12
Protictis	extinct	63.11	65.12
Protictis	extinct	63.11	65.12
Protictis	extinct	63.11	65.12
Protoselene	extinct	60	60.79
Protoselene	extinct	60.08	61.9
Protoselene	extinct	61.7	62.1
Protoselene	extinct	61.7	62.1
Protoselene	extinct	62.11	62.49
Protoselene	extinct	62.11	62.49
Protoselene	extinct	62.11	62.49
Protoselene	extinct	62.5	63.39
Protoselene	extinct	62.5	63.39
Protoselene	extinct	62.5	63.39
Protoselene	extinct	62.5	63.39
Protoselene	extinct	62.5	63.39
Protoselene	extinct	62.5	63.39
Protoselene	extinct	62.5	63.39
Protoselene	extinct	63.11	65.12
Protoselene	extinct	63.11	65.12
Protoselene	extinct	65.11	65.59
Protungulatum	extinct	65.11	65.59
Protungulatum	extinct	65.6	65.96
Protungulatum	extinct	65.97	66.03
Protungulatum	extinct	65.97	66.03
Protungulatum	extinct	65.97	66.03
Protungulatum	extinct	65.97	66.03
Protungulatum	extinct	66.04	69.9
Protungulatum	extinct	66.04	69.9
Protungulatum	extinct	66.04	69.9
Psittacotherium	extinct	62.11	62.49
Psittacotherium	extinct	62.11	62.49
Psittacotherium	extinct	62.5	63.39
Psittacotherium	extinct	62.5	63.39
Psittacotherium	extinct	62.5	63.39
Psittacotherium	extinct	62.5	63.39
Psittacotherium	extinct	62.5	63.39
Psittacotherium	extinct	62.5	63.39
Psittacotherium	extinct	62.5	63.39
Psittacotherium	extinct	62.5	63.39
Psittacotherium	extinct	62.5	63.39
Psydronyctia	extinct	60	60.79
Psydronyctia	extinct	60	60.79
Psydronyctia	extinct	61.7	62.1
Psydronyctia	extinct	62.5	63.39
Puercolestes	extinct	65.11	65.59
Puercolestes	extinct	65.11	65.59
Puercolestes	extinct	65.6	65.96
Puercolestes	extinct	65.6	65.96
Purgatorius	extinct	65.11	65.59
Purgatorius	extinct	65.6	65.96
Purgatorius	extinct	65.6	65.96
Raphictis	extinct	57.7	58.89
Raphictis	extinct	58.9	59.99
Raphictis	extinct	58.9	59.99
Raphictis	extinct	58.9	59.99
Raphictis	extinct	60	60.79
Raphictis	extinct	60	60.79
Raphictis	extinct	60	60.79
Raphictis	extinct	60	60.79
Raphictis	extinct	61.7	62.1
Ravenictis	extinct	65.6	65.96
Reithroparamys	extinct	55.85	56.49
Reithroparamys	extinct	56.5	56.95
Robertschochia	extinct	65.6	65.96
Saxonella	extinct	60	60.79
Saxonella	extinct	60	60.79
Scenopagus	extinct	57.7	58.89
Scenopagus	extinct	58.9	59.99
Scenopagus	extinct	58.9	59.99
Schowalteria	extinct	66.04	69.9
Scollardius	extinct	66.04	69.9
Scollardius	extinct	66.04	69.9
Scollardius	extinct	66.04	69.9
Scollardius	extinct	66.04	69.9
Scollardius	extinct	66.04	69.9
Scollardius	extinct	66.04	69.9
Sigynorum	extinct	65.97	66.03
Simpsonictis	extinct	60.08	61.9
Simpsonictis	extinct	61.7	62.1
Simpsonictis	extinct	61.7	62.1
Simpsonictis	extinct	62.5	63.39
Simpsonictis	extinct	62.5	63.39
Simpsonictis	extinct	62.5	63.39
Simpsonictis	extinct	62.5	63.39
Sinonyx	extinct	57.7	58.89
Talpavus	extinct	58.9	59.99
Telacodon	extinct	66.04	69.9
Tetraclaenodon	extinct	61.7	62.1
Tetraclaenodon	extinct	61.7	62.1
Tetraclaenodon	extinct	62.11	62.49
Tetraclaenodon	extinct	62.11	62.49
Tetraclaenodon	extinct	62.11	62.49
Tetraclaenodon	extinct	62.11	62.49
Tetraclaenodon	extinct	62.11	62.49
Tetraclaenodon	extinct	62.11	62.49
Tetraclaenodon	extinct	62.11	62.49
Tetraclaenodon	extinct	62.11	62.49
Tetraclaenodon	extinct	62.11	62.49
Tetraclaenodon	extinct	62.5	63.39
Tetraclaenodon	extinct	62.5	63.39
Tetraclaenodon	extinct	62.5	63.39
Tetraclaenodon	extinct	62.5	63.39
Tetraclaenodon	extinct	62.5	63.39
Tetraclaenodon	extinct	62.5	63.39
Tetraclaenodon	extinct	62.5	63.39
Tetraclaenodon	extinct	62.5	63.39
Tetraclaenodon	extinct	62.5	63.39
Tetraclaenodon	extinct	62.5	63.39
Tetraclaenodon	extinct	62.5	63.39
Tetraclaenodon	extinct	62.5	63.39
Tetraclaenodon	extinct	62.5	63.39
Tetraclaenodon	extinct	62.5	63.39
Tetraclaenodon	extinct	62.5	63.39
Tetraclaenodon	extinct	62.5	63.39
Tetraclaenodon	extinct	63.11	65.12
Tetraclaenodon	extinct	63.11	65.12
Thryptacodon	extinct	55.85	56.49
Thryptacodon	extinct	56.5	56.95
Thryptacodon	extinct	56.5	56.95
Thryptacodon	extinct	56.5	56.95
Thryptacodon	extinct	56.5	56.95
Thryptacodon	extinct	56.5	56.95
Thryptacodon	extinct	56.5	56.95
Thryptacodon	extinct	56.96	57.39
Thryptacodon	extinct	56.96	57.39
Thryptacodon	extinct	57.7	58.89
Thryptacodon	extinct	57.7	58.89
Thryptacodon	extinct	57.7	58.89
Thryptacodon	extinct	57.7	58.89
Thryptacodon	extinct	57.7	58.89
Thryptacodon	extinct	57.7	58.89
Thryptacodon	extinct	58.9	59.99
Thryptacodon	extinct	58.9	59.99
Thryptacodon	extinct	58.9	59.99
Thryptacodon	extinct	58.9	59.99
Thryptacodon	extinct	58.9	59.99
Thryptacodon	extinct	58.9	59.99
Thryptacodon	extinct	58.9	59.99
Thryptacodon	extinct	58.9	59.99
Thryptacodon	extinct	58.9	59.99
Thryptacodon	extinct	58.9	59.99
Thryptacodon	extinct	58.9	59.99
Thryptacodon	extinct	60	60.79
Thryptacodon	extinct	60	60.79
Thryptacodon	extinct	60	60.79
Thryptacodon	extinct	60	60.79
Thryptacodon	extinct	60	60.79
Thryptacodon	extinct	60	60.79
Thryptacodon	extinct	60	60.79
Thryptacodon	extinct	60	60.79
Thryptacodon	extinct	60	60.79
Thryptacodon	extinct	60.08	61.9
Thryptacodon	extinct	60.08	61.9
Thryptacodon	extinct	61.7	62.1
Thryptacodon	extinct	61.7	62.1
Thryptacodon	extinct	61.7	62.1
Thryptacodon	extinct	61.7	62.1
Thryptacodon	extinct	61.7	62.1
Tinimomys	extinct	56.5	56.95
Tinimomys	extinct	56.96	57.39
Tinuviel	extinct	65.6	65.96
Titanoides	extinct	56.5	56.95
Titanoides	extinct	57.7	58.89
Titanoides	extinct	58.9	59.99
Titanoides	extinct	58.9	59.99
Titanoides	extinct	58.9	59.99
Titanoides	extinct	58.9	59.99
Titanoides	extinct	58.9	59.99
Titanoides	extinct	58.9	59.99
Titanoides	extinct	58.9	59.99
Titanoides	extinct	58.9	59.99
Titanoides	extinct	58.9	59.99
Titanoides	extinct	60	60.79
Titanoides	extinct	60	60.79
Titanoides	extinct	60	60.79
Titanoides	extinct	60	60.79
Titanoides	extinct	60.08	61.9
Titanoides	extinct	60.08	61.9
Titanoides	extinct	61.7	62.1
Tiznatzinia	extinct	65.11	65.59
Tiznatzinia	extinct	65.6	65.96
Torrejonia	extinct	60.08	61.9
Torrejonia	extinct	61.7	62.1
Torrejonia	extinct	61.7	62.1
Torrejonia	extinct	61.7	62.1
Torrejonia	extinct	62.5	63.39
Tricentes	extinct	55.85	56.49
Tricentes	extinct	56.5	56.95
Tricentes	extinct	57.7	58.89
Tricentes	extinct	58.9	59.99
Tricentes	extinct	60	60.79
Tricentes	extinct	60	60.79
Tricentes	extinct	60	60.79
Tricentes	extinct	61.7	62.1
Tricentes	extinct	61.7	62.1
Tricentes	extinct	62.5	63.39
Tricentes	extinct	62.5	63.39
Triisodon	extinct	62.5	63.39
Triisodon	extinct	62.5	63.39
Triisodon	extinct	62.5	63.39
Triisodon	extinct	62.5	63.39
Triisodon	extinct	62.5	63.39
Triisodon	extinct	62.5	63.39
Triisodon	extinct	62.5	63.39
Triisodon	extinct	62.5	63.39
Triisodon	extinct	63.11	65.12
Tytthaena	extinct	56.5	56.95
Tytthaena	extinct	56.96	57.39
Tytthaena	extinct	60	60.79
Tytthaena	extinct	60	60.79
Uintacyon	extinct	55.85	56.49
Uintacyon	extinct	55.85	56.49
Uintacyon	extinct	56.5	56.95
Uintacyon	extinct	56.5	56.95
Unuchinia	extinct	57.7	58.89
Unuchinia	extinct	57.7	58.89
Unuchinia	extinct	58.9	59.99
Unuchinia	extinct	58.9	59.99
Unuchinia	extinct	58.9	59.99
Unuchinia	extinct	60	60.79
Unuchinia	extinct	60	60.79
Unuchinia	extinct	60	60.79
Unuchinia	extinct	60	60.79
Unuchinia	extinct	60.08	61.9
Unuchinia	extinct	61.7	62.1
Unuchinia	extinct	62.5	63.39
Utemylus	extinct	57.7	58.89
Utemylus	extinct	58.9	59.99
Viverravus	extinct	55.85	56.49
Viverravus	extinct	56.5	56.95
Viverravus	extinct	56.5	56.95
Viverravus	extinct	56.5	56.95
Viverravus	extinct	56.5	56.95
Viverravus	extinct	56.5	56.95
Viverravus	extinct	56.96	57.39
Viverravus	extinct	56.96	57.39
[truncated: 27 more rows]

## Sheet: Metatheria_occurrences_BDR
genus	status	ma_min	ma_max
Albertatherium	extinct	66.04	69.9
Alphadon	extinct	66.04	69.9
Alphadon	extinct	66.04	69.9
Alphadon	extinct	66.04	69.9
Alphadon	extinct	66.04	69.9
Alphadon	extinct	66.04	69.9
Alphadon	extinct	66.04	69.9
Alphadon	extinct	66.04	69.9
Alphadon	extinct	66.04	69.9
Alphadon	extinct	66.04	69.9
Alphadon	extinct	66.04	69.9
Alphadon	extinct	66.04	69.9
Alphadon	extinct	66.04	69.9
Alphadon	extinct	66.04	69.9
Alphadon	extinct	66.04	69.9
Alphadon	extinct	66.04	69.9
Alphadon	extinct	66.04	69.9
Alphadon	extinct	66.04	69.9
Alphadon	extinct	66.04	69.9
Alphadon	extinct	65.97	66.03
Didelphodon	extinct	66.04	69.9
Didelphodon	extinct	66.04	69.9
Didelphodon	extinct	66.04	69.9
Didelphodon	extinct	66.04	69.9
Didelphodon	extinct	66.04	69.9
Didelphodon	extinct	66.04	69.9
Didelphodon	extinct	66.04	69.9
Didelphodon	extinct	66.04	69.9
Didelphodon	extinct	66.04	69.9
Didelphodon	extinct	66.04	69.9
Didelphodon	extinct	66.04	69.9
Didelphodon	extinct	66.04	69.9
Didelphodon	extinct	66.04	69.9
Didelphodon	extinct	66.04	69.9
Didelphodon	extinct	66.04	69.9
Didelphodon	extinct	66.04	69.9
Didelphodon	extinct	66.04	69.9
Didelphodon	extinct	66.04	69.9
Didelphodon	extinct	66.04	69.9
Didelphodon	extinct	66.04	69.9
Eodelphis	extinct	66.04	69.9
Glasbius	extinct	66.04	69.9
Glasbius	extinct	66.04	69.9
Glasbius	extinct	66.04	69.9
Glasbius	extinct	66.04	69.9
Glasbius	extinct	66.04	69.9
Glasbius	extinct	66.04	69.9
Glasbius	extinct	66.04	69.9
Hatcheritherium	extinct	66.04	69.9
Leptalestes	extinct	66.04	69.9
Leptalestes	extinct	66.04	69.9
Leptalestes	extinct	66.04	69.9
Leptalestes	extinct	66.04	69.9
Leptalestes	extinct	66.04	69.9
Leptalestes	extinct	66.04	69.9
Leptalestes	extinct	66.04	69.9
Leptalestes	extinct	66.04	69.9
Leptalestes	extinct	66.04	69.9
Leptalestes	extinct	66.04	69.9
Leptalestes_x	extinct	66.04	69.9
Leptalestes_x	extinct	66.04	69.9
Leptalestes_x	extinct	66.04	69.9
Leptalestes_x	extinct	66.04	69.9
Leptalestes_x	extinct	66.04	69.9
Leptalestes_x	extinct	66.04	69.9
Leptalestes_x	extinct	66.04	69.9
Leptalestes_x	extinct	66.04	69.9
Mimoperadectes	extinct	55.85	56.49
Nanocuris	extinct	66.04	69.9
Nanocuris	extinct	66.04	69.9
Nanocuris	extinct	66.04	69.9
Nanocuris	extinct	66.04	69.9
Nortedelphys	extinct	66.04	69.9
Nortedelphys	extinct	66.04	69.9
Pediomys	extinct	66.04	69.9
Pediomys	extinct	66.04	69.9
Pediomys	extinct	66.04	69.9
Pediomys	extinct	66.04	69.9
Pediomys	extinct	66.04	69.9
Pediomys	extinct	66.04	69.9
Pediomys	extinct	66.04	69.9
Pediomys	extinct	66.04	69.9
Peradectes	extinct	65.97	66.03
Peradectes	extinct	65.97	66.03
Peradectes	extinct	65.97	66.03
Peradectes	extinct	65.97	66.03
Peradectes	extinct	65.6	65.96
Peradectes	extinct	65.6	65.96
Peradectes	extinct	65.11	65.59
Peradectes	extinct	65.11	65.59
Peradectes	extinct	65.11	65.59
Peradectes	extinct	65.11	65.59
Peradectes	extinct	63.4	65.12
Peradectes	extinct	62.5	63.39
Peradectes	extinct	62.5	63.39
Peradectes	extinct	62.11	62.49
Peradectes	extinct	61.7	62.1
Peradectes	extinct	61.7	62.1
Peradectes	extinct	61.7	62.1
Peradectes	extinct	61.7	62.1
Peradectes	extinct	60.8	61.69
Peradectes	extinct	60	60.79
Peradectes	extinct	60	60.79
Peradectes	extinct	60	60.79
Peradectes	extinct	60	60.79
Peradectes	extinct	60	60.79
Peradectes	extinct	60	60.79
Peradectes	extinct	60	60.79
Peradectes	extinct	58.9	59.99
Peradectes	extinct	58.9	59.99
Peradectes	extinct	58.9	59.99
Peradectes	extinct	58.9	59.99
Peradectes	extinct	58.9	59.99
Peradectes	extinct	58.9	59.99
Peradectes	extinct	57.7	58.9
Peradectes	extinct	57.7	58.9
Peradectes	extinct	57.7	58.9
Peradectes	extinct	57.7	58.9
Peradectes	extinct	56.96	57.39
Peradectes	extinct	56.96	57.39
Peradectes	extinct	56.5	57
Peradectes	extinct	56.5	57
Peradectes	extinct	56.5	57
Peradectes	extinct	55.85	56.49
Protalphadon	extinct	66.04	69.9
Protalphadon	extinct	66.04	69.9
Protalphadon	extinct	66.04	69.9
Protalphadon	extinct	66.04	69.9
Protalphadon	extinct	66.04	69.9
Protalphadon	extinct	66.04	69.9
Protalphadon	extinct	66.04	69.9
Protalphadon	extinct	66.04	69.9
Protolambda	extinct	66.04	69.9
Protolambda	extinct	66.04	69.9
Protolambda	extinct	66.04	69.9
Protolambda	extinct	66.04	69.9
Protolambda	extinct	66.04	69.9
Protolambda	extinct	66.04	69.9
Protolambda	extinct	66.04	69.9
Protolambda	extinct	66.04	69.9
Protolambda	extinct	66.04	69.9
Protolambda	extinct	66.04	69.9
Protolambda	extinct	66.04	69.9
Protolambda	extinct	66.04	69.9
Protolambda	extinct	66.04	69.9
Protolambda	extinct	66.04	69.9
Protolambda	extinct	66.04	69.9
Protolambda	extinct	66.04	69.9
Protolambda	extinct	66.04	69.9
Protolambda	extinct	66.04	69.9
Swaindelphys	extinct	62.5	63.39
Swaindelphys	extinct	62.11	62.49
Swaindelphys	extinct	62.11	62.49
Turgidodon	extinct	66.04	69.9
Turgidodon	extinct	66.04	69.9
Turgidodon	extinct	66.04	69.9
Turgidodon	extinct	66.04	69.9
Turgidodon	extinct	66.04	69.9
Turgidodon	extinct	66.04	69.9
Turgidodon	extinct	66.04	69.9
Turgidodon	extinct	66.04	69.9
Turgidodon	extinct	66.04	69.9
Typhlodelphys	extinct	60	60.79

## Sheet: Multituberculata_occurrences_BD
genus	status	ma_min	ma_max
Acheronodon	extinct	65.97	66.03
Acheronodon	extinct	62.5	63.39
Acheronodon	extinct	61.7	62.1
Allocosmodon	extinct	61.7	62.1
Allocosmodon	extinct	60	60.79
Allocosmodon	extinct	60	60.79
Allocosmodon	extinct	60	60.79
Allocosmodon	extinct	60	60.79
Alopocosmodon	extinct	62.5	63.39
Anconodon	extinct	62.5	63.39
Anconodon	extinct	62.5	63.39
Anconodon	extinct	62.5	63.39
Anconodon	extinct	62.5	63.39
Anconodon	extinct	62.11	62.49
Anconodon	extinct	62.11	62.49
Anconodon	extinct	62.11	62.49
Anconodon	extinct	62.11	62.49
Anconodon	extinct	61.7	62.1
Anconodon	extinct	61.7	62.1
Anconodon	extinct	61.7	62.1
Anconodon	extinct	61.7	62.1
Anconodon	extinct	60.08	61.69
Anconodon	extinct	60	60.79
Baiotomeus	extinct	62.5	63.39
Baiotomeus	extinct	62.11	62.49
Baiotomeus	extinct	62.11	62.49
Baiotomeus	extinct	62.11	62.49
Baiotomeus	extinct	61.7	62.1
Baiotomeus	extinct	61.7	62.1
Baiotomeus	extinct	61.7	62.1
Baiotomeus	extinct	61.7	62.1
Bubodens	extinct	66.04	69.9
Catopsalis	extinct	66.04	69.9
Catopsalis	extinct	65.97	66.03
Catopsalis	extinct	65.97	66.03
Catopsalis	extinct	65.97	66.03
Catopsalis	extinct	65.97	66.03
Catopsalis	extinct	65.6	65.96
Catopsalis	extinct	65.6	65.96
Catopsalis	extinct	65.11	65.59
Catopsalis	extinct	65.11	65.59
Catopsalis	extinct	65.11	65.59
Catopsalis	extinct	63.4	65.12
Catopsalis	extinct	62.5	63.39
Catopsalis	extinct	62.5	63.39
Catopsalis	extinct	62.11	62.49
Catopsalis	extinct	62.11	62.49
Catopsalis	extinct	62.11	62.49
Catopsalis	extinct	61.7	62.1
Cimexomys	extinct	66.04	69.9
Cimexomys	extinct	66.04	69.9
Cimexomys	extinct	66.04	69.9
Cimexomys	extinct	66.04	69.9
Cimexomys	extinct	66.04	69.9
Cimexomys	extinct	66.04	69.9
Cimexomys	extinct	65.97	66.03
Cimexomys	extinct	65.97	66.03
Cimexomys	extinct	65.97	66.03
Cimexomys	extinct	65.97	66.03
Cimexomys	extinct	65.6	65.96
Cimexomys	extinct	65.11	65.59
Cimexomys	extinct	65.11	65.59
Cimolodon	extinct	66.04	69.9
Cimolodon	extinct	66.04	69.9
Cimolodon	extinct	66.04	69.9
Cimolodon	extinct	66.04	69.9
Cimolodon	extinct	66.04	69.9
Cimolodon	extinct	66.04	69.9
Cimolodon	extinct	66.04	69.9
Cimolodon	extinct	66.04	69.9
Cimolodon	extinct	66.04	69.9
Cimolodon	extinct	66.04	69.9
Cimolodon	extinct	66.04	69.9
Cimolodon	extinct	66.04	69.9
Cimolodon	extinct	66.04	69.9
Cimolodon	extinct	66.04	69.9
Cimolodon	extinct	66.04	69.9
Cimolodon	extinct	66.04	69.9
Cimolodon	extinct	66.04	69.9
Cimolodon	extinct	66.04	69.9
Cimolodon	extinct	66.04	69.9
Cimolodon	extinct	66.04	69.9
Cimolodon	extinct	66.04	69.9
Cimolodon	extinct	66.04	69.9
Cimolodon	extinct	66.04	69.9
Cimolodon	extinct	63.4	65.12
Cimolomys	extinct	66.04	69.9
Cimolomys	extinct	66.04	69.9
Cimolomys	extinct	66.04	69.9
Cimolomys	extinct	66.04	69.9
Cimolomys	extinct	66.04	69.9
Cimolomys	extinct	66.04	69.9
Cimolomys	extinct	66.04	69.9
Cimolomys	extinct	66.04	69.9
Cimolomys	extinct	66.04	69.9
Cimolomys	extinct	66.04	69.9
Cimolomys	extinct	66.04	69.9
Clemensodon	extinct	66.04	69.9
Ectypodus	extinct	65.6	65.96
Ectypodus	extinct	65.6	65.96
Ectypodus	extinct	65.6	65.96
Ectypodus	extinct	65.11	65.59
Ectypodus	extinct	65.11	65.59
Ectypodus	extinct	62.5	63.39
Ectypodus	extinct	62.5	63.39
Ectypodus	extinct	62.5	63.39
Ectypodus	extinct	62.5	63.39
Ectypodus	extinct	62.11	62.49
Ectypodus	extinct	61.7	62.1
Ectypodus	extinct	61.7	62.1
Ectypodus	extinct	61.7	62.1
Ectypodus	extinct	60.08	61.69
Ectypodus	extinct	60.08	61.69
Ectypodus	extinct	60	60.79
Ectypodus	extinct	60	60.79
Ectypodus	extinct	60	60.79
Ectypodus	extinct	60	60.79
Ectypodus	extinct	60	60.79
Ectypodus	extinct	60	60.79
Ectypodus	extinct	60	60.79
Ectypodus	extinct	58.9	59.99
Ectypodus	extinct	58.9	59.99
Ectypodus	extinct	58.9	59.99
Ectypodus	extinct	58.9	59.99
Ectypodus	extinct	58.9	59.99
Ectypodus	extinct	58.9	59.99
Ectypodus	extinct	57.7	58.89
Ectypodus	extinct	57.7	58.89
Ectypodus	extinct	57.7	58.89
Ectypodus	extinct	57.7	58.89
Ectypodus	extinct	57.7	58.89
Ectypodus	extinct	57.7	58.89
Ectypodus	extinct	57.4	57.69
Ectypodus	extinct	56.96	57.39
Ectypodus	extinct	56.5	56.95
Ectypodus	extinct	56.5	56.95
Ectypodus	extinct	56.5	56.95
Ectypodus	extinct	55.85	56.49
Essonodon	extinct	66.04	69.9
Essonodon	extinct	66.04	69.9
Essonodon	extinct	66.04	69.9
Essonodon	extinct	66.04	69.9
Essonodon	extinct	66.04	69.9
Essonodon	extinct	66.04	69.9
Eucosmodon	extinct	65.11	65.59
Eucosmodon	extinct	62.5	63.39
Eucosmodon	extinct	62.5	63.39
Eucosmodon	extinct	62.11	62.49
Eucosmodon	extinct	61.7	62.1
Fractinus	extinct	61.7	62.1
Kimbetohia	extinct	65.97	66.03
Kimbetohia	extinct	65.6	65.96
Kimbetohia	extinct	65.6	65.96
Kimbetopsalis	extinct	65.6	65.96
Krauseia	extinct	62.5	63.39
Krauseia	extinct	62.11	62.49
Krauseia	extinct	61.7	62.1
Meniscoessus	extinct	66.04	69.9
Meniscoessus	extinct	66.04	69.9
Meniscoessus	extinct	66.04	69.9
Meniscoessus	extinct	66.04	69.9
Meniscoessus	extinct	66.04	69.9
Meniscoessus	extinct	66.04	69.9
Meniscoessus	extinct	66.04	69.9
Meniscoessus	extinct	66.04	69.9
Meniscoessus	extinct	66.04	69.9
Meniscoessus	extinct	66.04	69.9
Meniscoessus	extinct	66.04	69.9
Meniscoessus	extinct	66.04	69.9
Meniscoessus	extinct	66.04	69.9
Meniscoessus	extinct	66.04	69.9
Meniscoessus	extinct	66.04	69.9
Meniscoessus	extinct	66.04	69.9
Meniscoessus	extinct	66.04	69.9
Meniscoessus	extinct	66.04	69.9
Meniscoessus	extinct	66.04	69.9
Meniscoessus	extinct	66.04	69.9
Meniscoessus	extinct	66.04	69.9
Meniscoessus	extinct	66.04	69.9
Meniscoessus	extinct	66.04	69.9
Meniscoessus	extinct	66.04	69.9
Meniscoessus	extinct	66.04	69.9
Meniscoessus	extinct	66.04	69.9
Meniscoessus	extinct	66.04	69.9
Meniscoessus	extinct	66.04	69.9
Mesodma	extinct	66.04	69.9
Mesodma	extinct	66.04	69.9
Mesodma	extinct	66.04	69.9
Mesodma	extinct	66.04	69.9
Mesodma	extinct	66.04	69.9
Mesodma	extinct	66.04	69.9
Mesodma	extinct	66.04	69.9
Mesodma	extinct	66.04	69.9
Mesodma	extinct	66.04	69.9
Mesodma	extinct	66.04	69.9
Mesodma	extinct	66.04	69.9
Mesodma	extinct	66.04	69.9
Mesodma	extinct	66.04	69.9
Mesodma	extinct	66.04	69.9
Mesodma	extinct	66.04	69.9
Mesodma	extinct	66.04	69.9
Mesodma	extinct	66.04	69.9
Mesodma	extinct	66.04	69.9
Mesodma	extinct	66.04	69.9
Mesodma	extinct	66.04	69.9
Mesodma	extinct	66.04	69.9
Mesodma	extinct	66.04	69.9
Mesodma	extinct	66.04	69.9
Mesodma	extinct	66.04	69.9
Mesodma	extinct	65.97	66.03
Mesodma	extinct	65.97	66.03
Mesodma	extinct	65.97	66.03
Mesodma	extinct	65.97	66.03
Mesodma	extinct	65.97	66.03
Mesodma	extinct	65.97	66.03
Mesodma	extinct	65.6	65.96
Mesodma	extinct	65.6	65.96
Mesodma	extinct	65.6	65.96
Mesodma	extinct	65.11	65.59
Mesodma	extinct	65.11	65.59
Mesodma	extinct	63.4	65.12
Mesodma	extinct	63.4	65.12
Mesodma	extinct	62.5	63.39
Mesodma	extinct	62.5	63.39
Mesodma	extinct	62.11	62.49
Mesodma	extinct	62.11	62.49
Mesodma	extinct	62.11	62.49
Mesodma	extinct	61.7	62.1
Mesodma	extinct	61.7	62.1
Mesodma	extinct	60.08	61.69
Mesodma	extinct	60.08	61.69
Mesodma	extinct	60	60.79
Mesodma	extinct	60	60.79
Mesodma	extinct	60	60.79
Mesodma	extinct	60	60.79
Mesodma	extinct	60	60.79
Mesodma	extinct	58.9	59.99
Mesodma	extinct	58.9	59.99
Mesodma	extinct	58.9	59.99
Mesodma	extinct	58.9	59.99
Microcosmodon	extinct	65.97	66.03
Microcosmodon	extinct	65.6	65.96
Microcosmodon	extinct	65.11	65.59
Microcosmodon	extinct	63.4	65.12
Microcosmodon	extinct	60	60.79
Microcosmodon	extinct	58.9	59.99
Microcosmodon	extinct	58.9	59.99
Microcosmodon	extinct	58.9	59.99
Microcosmodon	extinct	58.9	59.99
Microcosmodon	extinct	57.7	58.89
Microcosmodon	extinct	57.7	58.89
Microcosmodon	extinct	57.7	58.89
Microcosmodon	extinct	57.7	58.89
Microcosmodon	extinct	56.96	57.39
Microcosmodon	extinct	56.5	56.95
Microcosmodon	extinct	56.5	56.95
Mimetodon	extinct	62.5	63.39
Mimetodon	extinct	62.5	63.39
Mimetodon	extinct	62.5	63.39
Mimetodon	extinct	62.5	63.39
Mimetodon	extinct	62.11	62.49
Mimetodon	extinct	62.11	62.49
Mimetodon	extinct	61.7	62.1
Mimetodon	extinct	61.7	62.1
Mimetodon	extinct	61.7	62.1
Mimetodon	extinct	61.7	62.1
Mimetodon	extinct	60	60.79
Mimetodon	extinct	60	60.79
Mimetodon	extinct	60	60.79
Mimetodon	extinct	60	60.79
Mimetodon	extinct	58.9	59.99
Mimetodon	extinct	58.9	59.99
Mimetodon	extinct	58.9	59.99
Mimetodon	extinct	58.9	59.99
Mimetodon	extinct	57.7	58.89
Mimetodon	extinct	57.7	58.89
Neoliotomus	extinct	57.7	58.89
Neoliotomus	extinct	57.4	57.69
Neoliotomus	extinct	56.96	57.39
Neoliotomus	extinct	56.96	57.39
Neoliotomus	extinct	56.5	56.95
Neoliotomus	extinct	56.5	56.95
Neoliotomus	extinct	56.5	56.95
Neoplagiaulax	extinct	65.6	65.96
Neoplagiaulax	extinct	65.6	65.96
Neoplagiaulax	extinct	65.11	65.59
Neoplagiaulax	extinct	63.4	65.12
Neoplagiaulax	extinct	63.4	65.12
Neoplagiaulax	extinct	62.5	63.39
Neoplagiaulax	extinct	62.5	63.39
Neoplagiaulax	extinct	62.5	63.39
Neoplagiaulax	extinct	62.11	62.49
Neoplagiaulax	extinct	62.11	62.49
Neoplagiaulax	extinct	62.11	62.49
Neoplagiaulax	extinct	62.11	62.49
Neoplagiaulax	extinct	61.7	62.1
Neoplagiaulax	extinct	61.7	62.1
Neoplagiaulax	extinct	61.7	62.1
Neoplagiaulax	extinct	61.7	62.1
Neoplagiaulax	extinct	61.7	62.1
Neoplagiaulax	extinct	61.7	62.1
Neoplagiaulax	extinct	61.7	62.1
Neoplagiaulax	extinct	60.08	61.69
Neoplagiaulax	extinct	60	60.79
Neoplagiaulax	extinct	60	60.79
Neoplagiaulax	extinct	60	60.79
Neoplagiaulax	extinct	60	60.79
Neoplagiaulax	extinct	60	60.79
Neoplagiaulax	extinct	60	60.79
Neoplagiaulax	extinct	60	60.79
Neoplagiaulax	extinct	60	60.79
Neoplagiaulax	extinct	60	60.79
Neoplagiaulax	extinct	60	60.79
Neoplagiaulax	extinct	60	60.79
Neoplagiaulax	extinct	58.9	59.99
Neoplagiaulax	extinct	58.9	59.99
Neoplagiaulax	extinct	58.9	59.99
Neoplagiaulax	extinct	58.9	59.99
Neoplagiaulax	extinct	58.9	59.99
Neoplagiaulax	extinct	58.9	59.99
Neoplagiaulax	extinct	58.9	59.99
Neoplagiaulax	extinct	58.9	59.99
Neoplagiaulax	extinct	58.9	59.99
Neoplagiaulax	extinct	58.9	59.99
Neoplagiaulax	extinct	58.9	59.99
Neoplagiaulax	extinct	57.7	58.89
Neoplagiaulax_x	extinct	66.04	69.9
Neoplagiaulax_x	extinct	66.04	69.9
Paracimexomys	extinct	66.04	69.9
Paracimexomys	extinct	66.04	69.9
Paracimexomys	extinct	66.04	69.9
Paracimexomys	extinct	66.04	69.9
Paracimexomys	extinct	66.04	69.9
Paracimexomys	extinct	66.04	69.9
Parectypodus	extinct	66.04	69.9
Parectypodus	extinct	66.04	69.9
Parectypodus	extinct	65.6	65.96
Parectypodus	extinct	65.6	65.96
Parectypodus	extinct	65.11	65.59
Parectypodus	extinct	65.11	65.59
Parectypodus	extinct	63.4	65.12
Parectypodus	extinct	62.5	63.39
Parectypodus	extinct	62.5	63.39
Parectypodus	extinct	62.5	63.39
Parectypodus	extinct	62.11	62.49
Parectypodus	extinct	62.11	62.49
Parectypodus	extinct	61.7	62.1
Parectypodus	extinct	61.7	62.1
Parectypodus	extinct	61.7	62.1
Parectypodus	extinct	60	60.79
Parectypodus	extinct	60	60.79
Parectypodus	extinct	60	60.79
Parectypodus	extinct	58.9	59.99
Parectypodus	extinct	58.9	59.99
Parectypodus	extinct	57.7	58.89
Parectypodus	extinct	57.7	58.89
Parectypodus	extinct	57.7	58.89
Parectypodus	extinct	56.96	57.39
Parectypodus	extinct	56.5	56.95
Paressonodon	extinct	66.04	69.9
Paressonodon	extinct	66.04	69.9
Parikimys	extinct	66.04	69.9
Parikimys	extinct	66.04	69.9
Pentacosmodon	extinct	61.7	62.1
Pentacosmodon	extinct	57.7	58.89
Pentacosmodon	extinct	57.7	58.89
Pentacosmodon	extinct	57.7	58.89
Prochetodon	extinct	65.11	65.59
Prochetodon	extinct	61.7	62.1
Prochetodon	extinct	61.7	62.1
Prochetodon	extinct	60	60.79
Prochetodon	extinct	60	60.79
Prochetodon	extinct	58.9	59.99
Prochetodon	extinct	58.9	59.99
Prochetodon	extinct	58.9	59.99
Prochetodon	extinct	58.9	59.99
Prochetodon	extinct	58.9	59.99
Prochetodon	extinct	58.9	59.99
Prochetodon	extinct	58.9	59.99
Prochetodon	extinct	58.9	59.99
Prochetodon	extinct	57.7	58.89
Prochetodon	extinct	57.7	58.89
Prochetodon	extinct	57.7	58.89
Prochetodon	extinct	57.7	58.89
Prochetodon	extinct	57.4	57.69
Prochetodon	extinct	56.96	57.39
Prochetodon	extinct	56.5	56.95
Prochetodon	extinct	56.5	56.95
Ptilodus	extinct	65.6	65.96
Ptilodus	extinct	65.6	65.96
Ptilodus	extinct	65.6	65.96
Ptilodus	extinct	65.11	65.59
Ptilodus	extinct	65.11	65.59
Ptilodus	extinct	63.4	65.12
Ptilodus	extinct	63.4	65.12
Ptilodus	extinct	63.4	65.12
Ptilodus	extinct	62.5	63.39
Ptilodus	extinct	62.5	63.39
Ptilodus	extinct	62.5	63.39
Ptilodus	extinct	62.5	63.39
Ptilodus	extinct	62.5	63.39
Ptilodus	extinct	62.5	63.39
Ptilodus	extinct	62.11	62.49
Ptilodus	extinct	62.11	62.49
Ptilodus	extinct	62.11	62.49
Ptilodus	extinct	62.11	62.49
Ptilodus	extinct	62.11	62.49
Ptilodus	extinct	61.7	62.1
Ptilodus	extinct	61.7	62.1
Ptilodus	extinct	61.7	62.1
Ptilodus	extinct	61.7	62.1
Ptilodus	extinct	61.7	62.1
Ptilodus	extinct	61.7	62.1
Ptilodus	extinct	61.7	62.1
Ptilodus	extinct	61.7	62.1
Ptilodus	extinct	61.7	62.1
Ptilodus	extinct	60.08	61.69
Ptilodus	extinct	60.08	61.69
Ptilodus	extinct	60.08	61.69
Ptilodus	extinct	60	60.79
Ptilodus	extinct	60	60.79
Ptilodus	extinct	60	60.79
Ptilodus	extinct	60	60.79
Ptilodus	extinct	60	60.79
Ptilodus	extinct	60	60.79
Ptilodus	extinct	60	60.79
Ptilodus	extinct	60	60.79
Ptilodus	extinct	60	60.79
Ptilodus	extinct	60	60.79
Ptilodus	extinct	60	60.79
Ptilodus	extinct	58.9	59.99
Ptilodus	extinct	58.9	59.99
Ptilodus	extinct	58.9	59.99
Ptilodus	extinct	58.9	59.99
Ptilodus	extinct	58.9	59.99
Ptilodus	extinct	58.9	59.99
Ptilodus	extinct	58.9	59.99
Ptilodus	extinct	58.9	59.99
Ptilodus	extinct	58.9	59.99
Ptilodus	extinct	58.9	59.99
Ptilodus	extinct	58.9	59.99
Ptilodus	extinct	58.9	59.99
Ptilodus	extinct	58.9	59.99
Ptilodus	extinct	58.9	59.99
Ptilodus	extinct	58.9	59.99
Ptilodus	extinct	58.9	59.99
Ptilodus	extinct	58.9	59.99
Ptilodus	extinct	57.7	58.89
Ptilodus	extinct	57.7	58.89
Ptilodus	extinct	57.7	58.89
Ptilodus	extinct	57.7	58.89
Ptilodus	extinct	56.5	56.95
Ptilodus	extinct	56.5	56.95
Stygimys	extinct	66.04	69.9
Stygimys	extinct	66.04	69.9
Stygimys	extinct	65.97	66.03
Stygimys	extinct	65.97	66.03
Stygimys	extinct	65.6	65.96
Stygimys	extinct	65.6	65.96
Stygimys	extinct	65.6	65.96
Stygimys	extinct	65.11	65.59
Stygimys	extinct	65.11	65.59
Stygimys	extinct	63.4	65.12
Stygimys	extinct	62.5	63.39
Stygimys	extinct	62.5	63.39
Stygimys	extinct	62.5	63.39
Taeniolabis	extinct	65.6	65.96
Taeniolabis	extinct	65.11	65.59
Taeniolabis	extinct	65.11	65.59
Taeniolabis	extinct	65.11	65.59
Taeniolabis	extinct	65.11	65.59
Taeniolabis	extinct	65.11	65.59
Valenopsalis	extinct	66.04	69.9
Viridomys	extinct	63.4	65.12
Xanclomys	extinct	62.5	63.39
Xyronomys	extinct	65.97	66.03
Xyronomys	extinct	65.6	65.96
Xyronomys	extinct	65.11	65.59
Xyronomys	extinct	65.11	65.59
Xyronomys	extinct	62.5	63.39
Xyronomys	extinct	62.5	63.39

## Sheet: taxon_survival
taxon	alive_before	alive_after
Acritoparamys	1	0
Adunator	1	0
Albertatherium	0	1
Alphadon	0	1
Apheliscus	1	0
Arctodontomys	1	0
Azygonyx	1	0
Chriacus	1	0
Cimexomys	0	1
Cimolestes	0	1
Cimolodon	0	1
Cimolomys	0	1
Copecion	1	0
Coryphodon	1	0
Didelphodon	0	1
Didymictis	1	0
Dipsalidictis	1	0
Dissacus	1	0
Ectocion	1	0
Ectoganus	1	0
Ectypodus	1	0
Eodelphis	0	1
Esthonyx	1	0
Gypsonictops	0	1
Haplomylus	1	0
Hyopsodus	1	0
Ignacius	1	0
Labidolemur	1	0
Leipsanolestes	1	0
Leptacodon	1	0
Leptalestes	0	1
Leptalestes_x	0	1
Meniscoessus	0	1
Mesodma	0	1
Microsyops	1	0
Mimoperadectes	1	0
Niptomomys	1	0
Palaeanodon	1	0
Palaeonictis	1	0
Palaeosinopa	1	0
Paracimexomys	0	1
Paramys	1	0
Paranyctoides	0	1
Pediomys	0	1
Peradectes	1	0
Phenacodus	1	0
Phenacolemur	1	0
Plagioctenodon	1	0
Plagiomene	1	0
Princetonia	1	0
Probathyopsis	1	0
Prodiacodon	1	0
Protalphadon	0	1
Reithroparamys	1	0
Thryptacodon	1	0
Turgidodon	0	1
Uintacyon	1	0
Viverravus	1	0

## Sheet: preservationWindows.txt
66.04
62.11
58.9
